# Supplementary material for: Intrinsic TGF-β signaling attenuates proximal tubule mitochondrial injury and inflammation in chronic kidney disease
Source: PubMed Central journal article supplement (PMC10239443; doi:10.1038/s41467-023-39050-y), 2023-06-03
Supplement: 41467_2023_39050_MOESM1_ESM.pdf [file 41467_2023_39050_MOESM1_ESM.pdf]

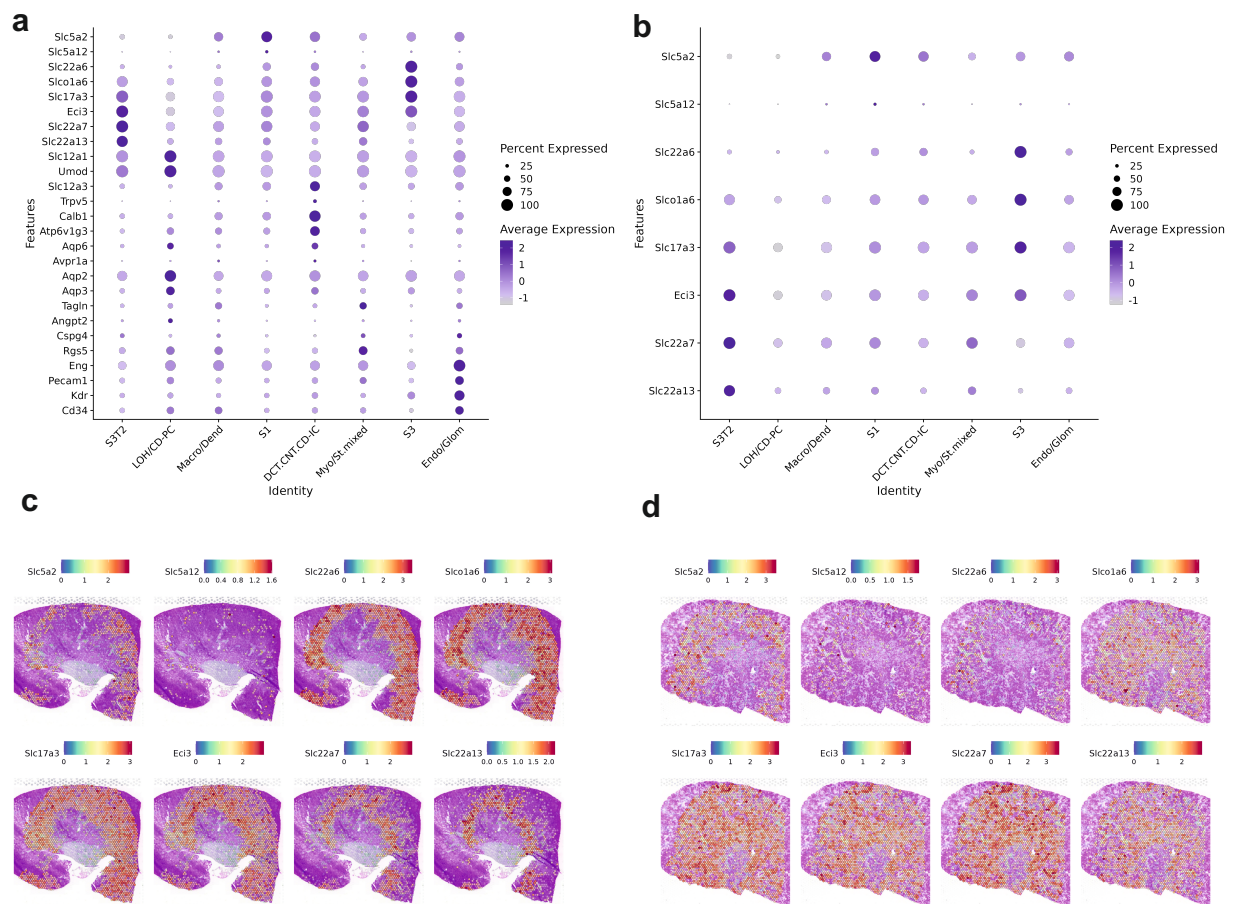

**Supplementary Fig. 1:** (a,b) Dotplots depicting cell type markers and (b) selected PT markers (S1,S3 and S3T2). (c,d) Representative spatial featplot of PT markers resolved on uninjured (c) and injured (d) kidneys showing specific spatial localization of PT cells in uninjured and impairment under injury.



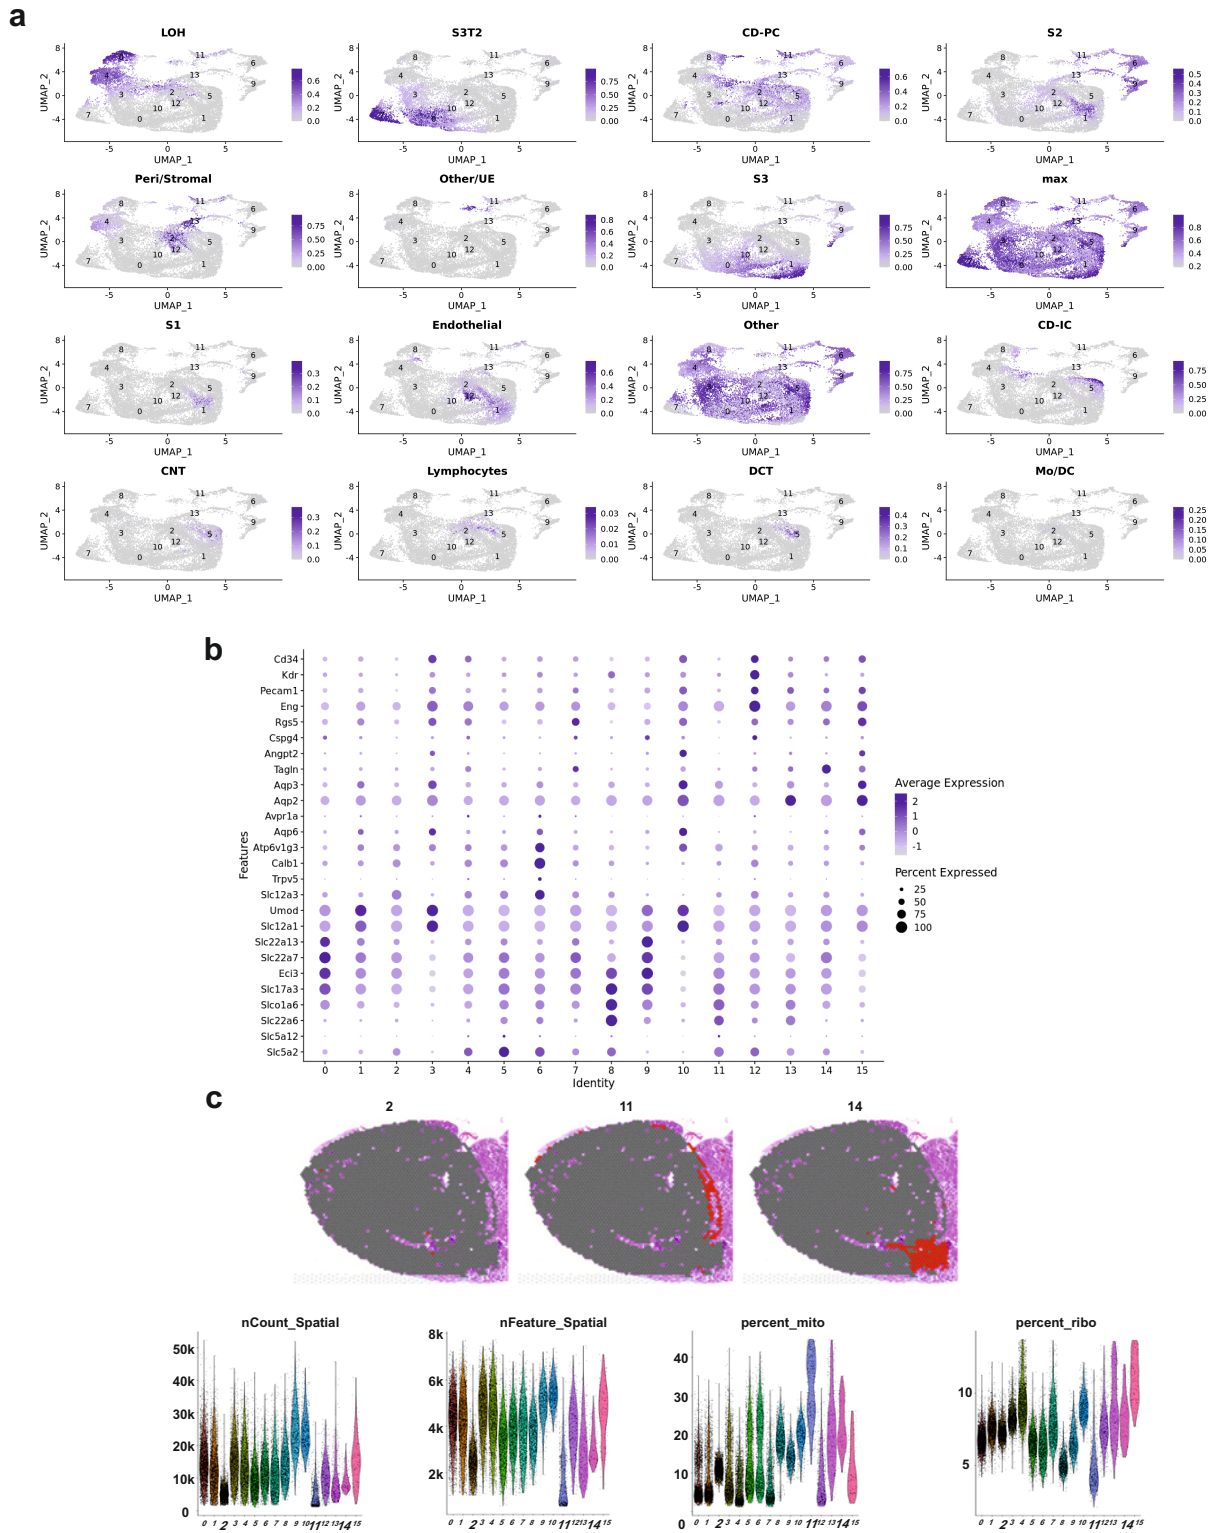

**Supplementary Fig. 2: Spatial transcriptomics cluster annotation and cell type identification.** (a, b) Probabilistic transfer of single-cell data to spatial transcriptomics, showing cluster prediction scores and specific marker expression features per cluster. (c) Representative cluster resolution on H&E stained kidney images and multimetric quality control analysis used for data curating and removal of low quality clusters (e.g. 2, 11 and 14) preformed on all spatial transcriptomics datasets.

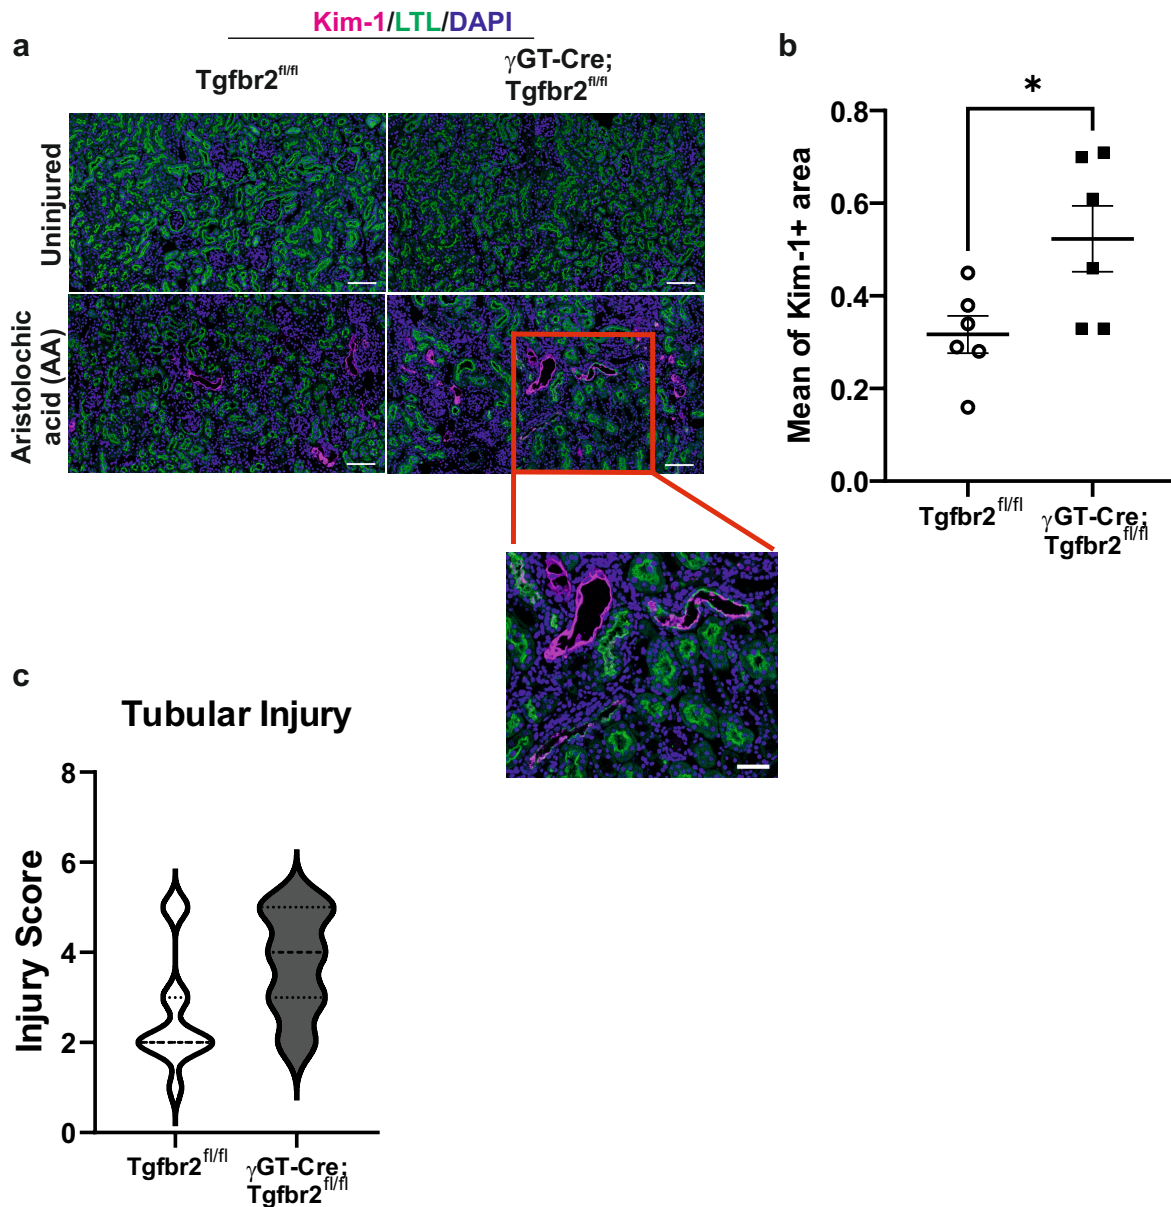

**Supplementary Fig. 3:** (a, b) Representative immunofluorescence images and quantification of Kim-1 protein expression showing increased injured proximal tubules in the renal cortices of  $\gamma$ GT-Cre;Tgfr2<sup>fl/fl</sup> mice compared to their Tgfr2<sup>fl/fl</sup> littermates 3 weeks after AA injury; n=6 (Tgfr2<sup>fl/fl</sup>) and 6 ( $\gamma$ GT-Cre;Tgfr2<sup>fl/fl</sup>) mice,  $p= 0.0302$ . Scale bar=50 $\mu$ m. (c) H&E injury quantification score showing increased tubular injury in  $\gamma$ GT-Cre;Tgfr2<sup>fl/fl</sup> mice compared to their Tgfr2<sup>fl/fl</sup> littermates 6 weeks after AA injury; n=11 (Tgfr2<sup>fl/fl</sup>) and 12 ( $\gamma$ GT-Cre;Tgfr2<sup>fl/fl</sup>) mice,  $p= 0.0389$ . Data are presented as mean values  $\pm$ SEM. Statistical significance was determined by unpaired Student's *t* test (two groups) with  $p<0.05$  considered statistically significant. The dots represents the number of animals per group (b). \* represents  $p<0.05$ . Source data are provided as a Source Data file.

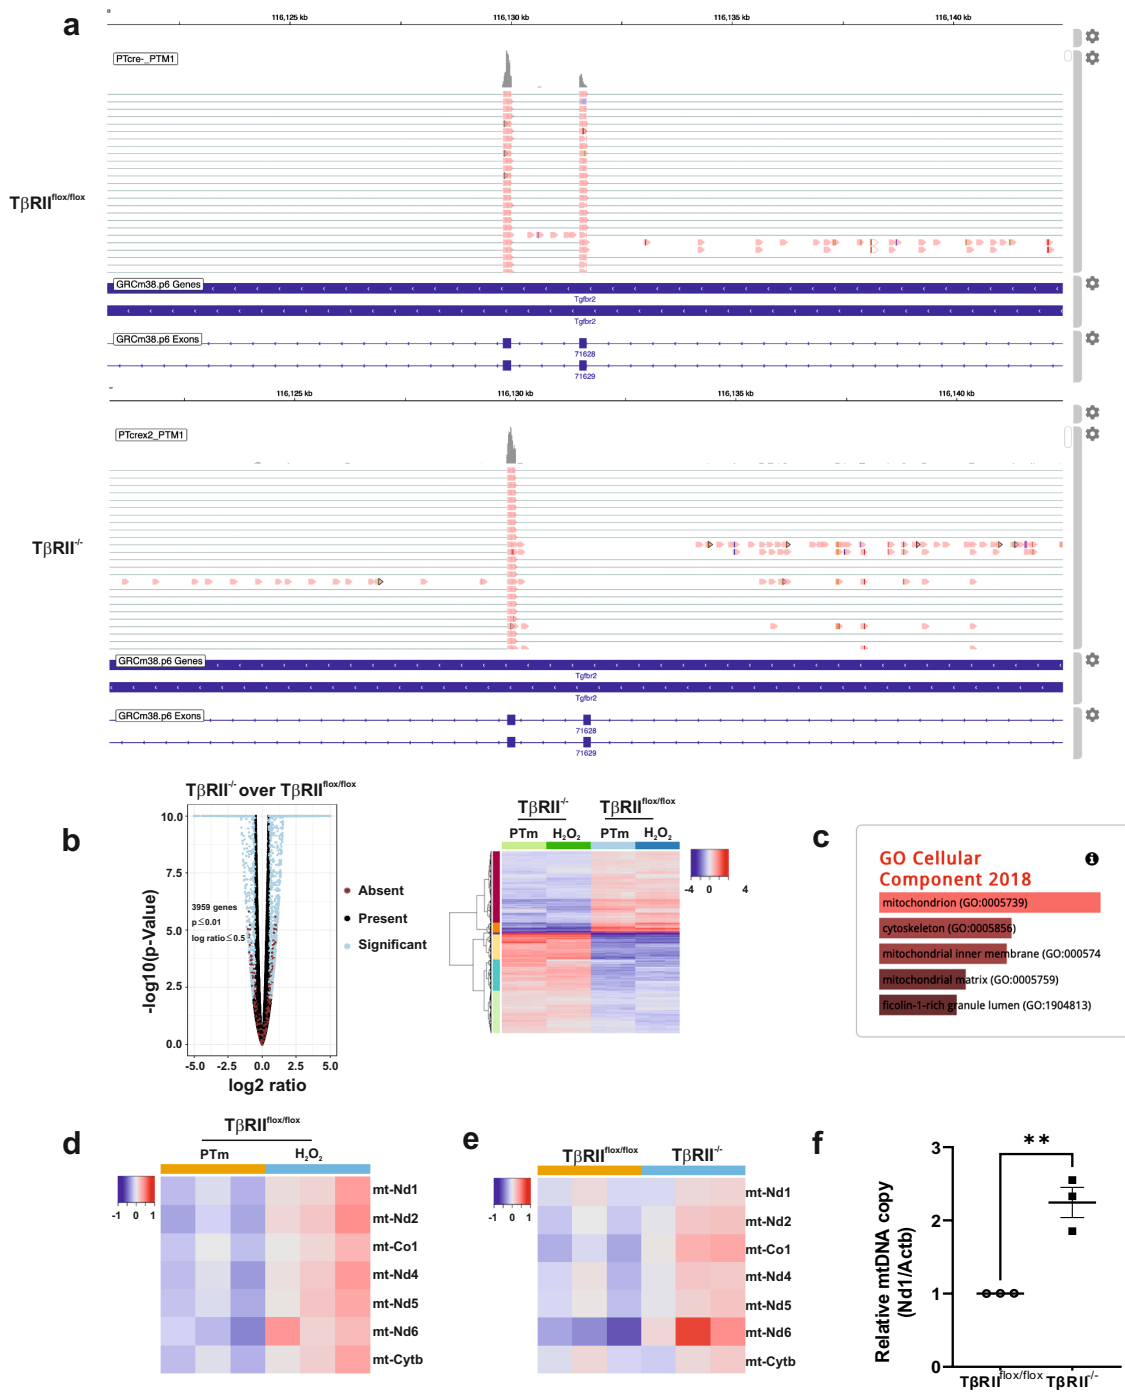

**Supplementary Fig. 4: Proximal tubule TβRII deletion affects mitochondrial homeostasis.** (a) Integrative Genomics Viewer images of sequencing showing the deletion of TβRII exon 2 in TβRII<sup>-/-</sup> PT cells. (b) Volcano plot and heatmap of an RNAseq analysis of PT cells treated or not with H<sub>2</sub>O<sub>2</sub> showing 3359 genes deregulated genes (p<0.01 and fc≥ 1.5) in TβRII<sup>-/-</sup> compared to TβRII<sup>flox/flox</sup> PT cells. (c) Overrepresentation analysis using EnrichR revealed mitochondrion as the top affected cellular component in TβRII<sup>-/-</sup> PT cells as compared to TβRII<sup>flox/flox</sup> PT cells. (d) Heatmap of TβRII<sup>flox/flox</sup> PT cells treated or not with H<sub>2</sub>O<sub>2</sub> showing oxidative stress induction of mt-genome encoded mRNAs of electron transport chain subunits. (e) Heatmap of PT cells showing relative mtDNA copy (Nd1/Actb) in TβRII<sup>flox/flox</sup> and TβRII<sup>-/-</sup> PT cells.

basal induction of mt-genome encoded electron transport chain subunit mRNA in T $\beta$ R11<sup>-/-</sup> PT cells compared to T $\beta$ R11<sup>flx/flx</sup> PT cells. (f) Mitochondrial DNA synthesis measured by RT-qPCR using the mt-genome encoded gene (Nd1) and normalized to the nuclear genome encoded gene ( $\beta$ -actin) showing increased mitochondrial biogenesis in T $\beta$ R11<sup>-/-</sup> PT cells (n=3 independent experiments,  $p= 0.0038$ ). Data are presented as mean values  $\pm$ SEM. Statistical significance was determined by unpaired Student's *t* tests. \*\**p* represents  $<0.01$ . Source data are provided as a Source Data file.

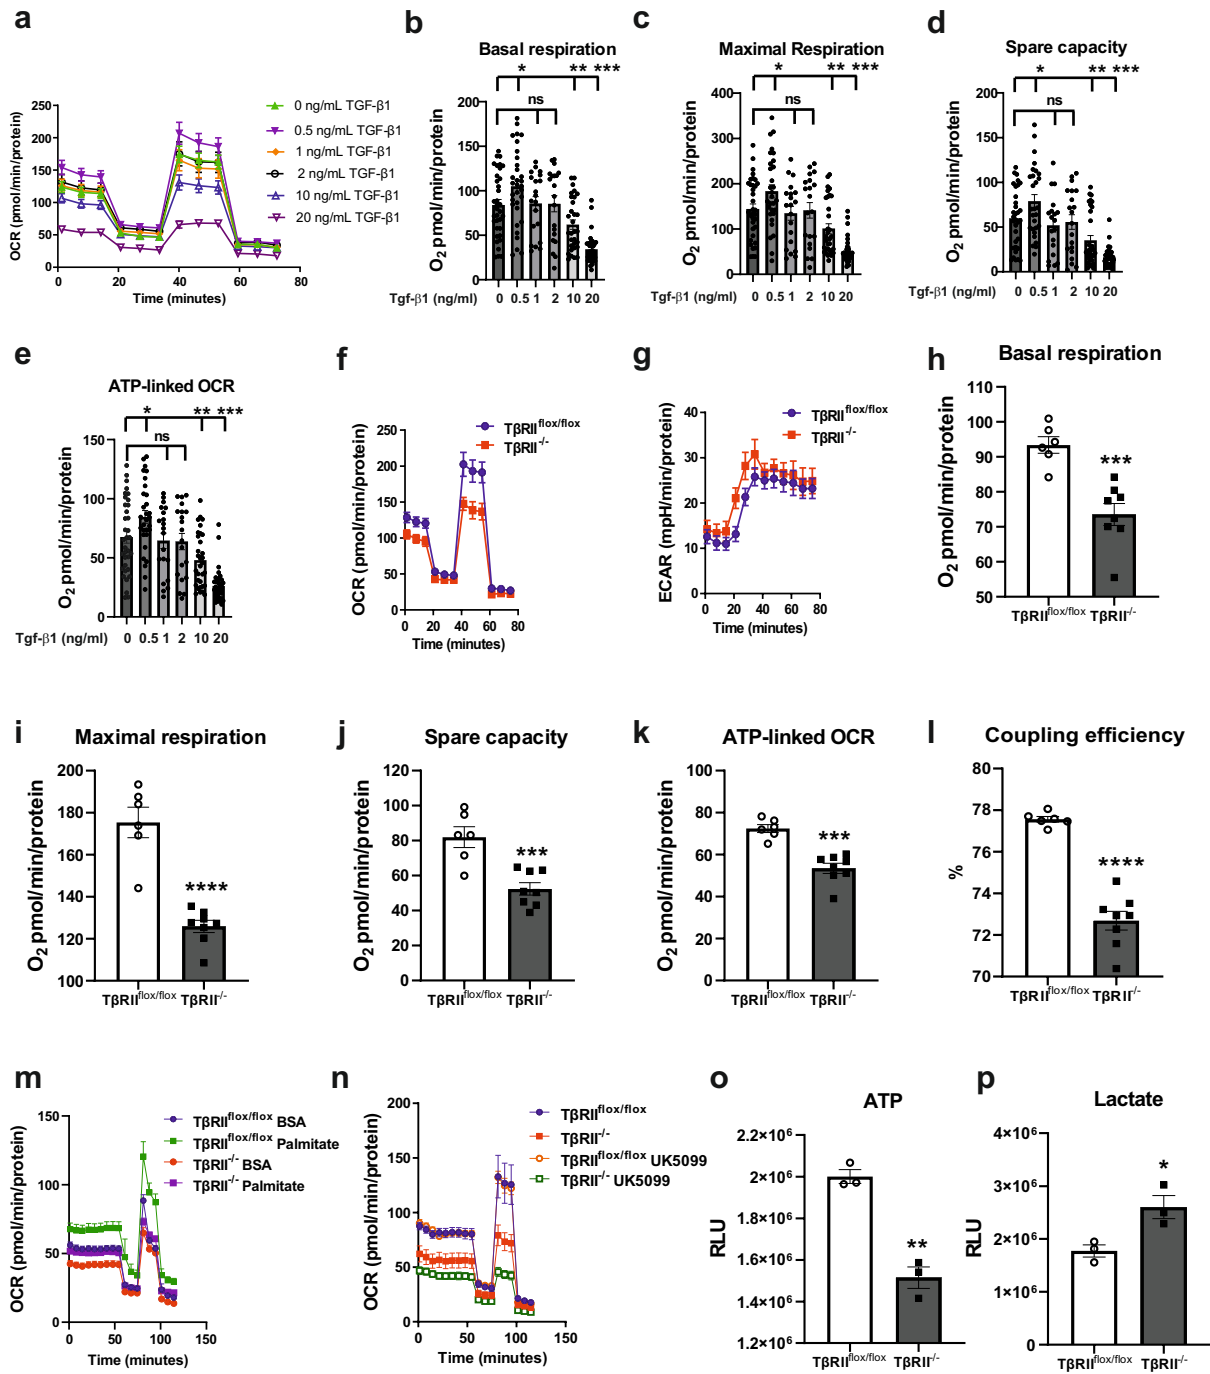

**Supplementary Fig. 5:** Proximal tubule TβRII deletion disrupts mitochondrial function and metabolism in vitro. (a-e) Seahorse analyses showing dose-dependent effect of TGF-β on TβRII<sup>flox/flox</sup> PT cell respiration (basal and maximal) and ATP production through OXPHOS (spare capacity and ATP-link OCR) (n=3 independent experiments). (f-l) Seahorse analyses showing decreased respiration (basal  $p = 0.0005$  and  $p < 0.0001$  maximal), spare capacity ( $p = 0.0007$ ) and ATP-linked OCR ( $p < 0.0001$ ) and slightly increased extracellular acidification rate (ECAR) in TβRII<sup>-/-</sup> compared to TβRII<sup>flox/flox</sup> PT cells. Seahorse analyses of coupling efficiency ( $p < 0.0001$ )



showing a decrease in  $T\beta RII^{-/-}$  compared to  $T\beta RII^{flox/flox}$  PT cells (n=3 independent experiments). (m) Representative graph of seahorse analysis of fatty acid oxidation showing decreased residual ability to metabolize fatty acid in  $T\beta RII^{-/-}$  compared to  $T\beta RII^{flox/flox}$  PT cells (n= 3 independent biological replicates). (n) Representative graph of seahorse analyses of substrate dependency indicating increased glycolytic dependency in  $T\beta RII^{-/-}$  compared to  $T\beta RII^{flox/flox}$  PT cells (n= 3 independent biological replicates). (o) Bioluminescence measurement of ATP production showing decreased production in  $T\beta RII^{-/-}$  compared to  $T\beta RII^{flox/flox}$  PT cells (n=3 independent experiments,  $p= 0.0014$ ). (p) Bioluminescence measurement of lactate production showing increased production in  $T\beta RII^{-/-}$  compared to  $T\beta RII^{flox/flox}$  PT cells (n=3 independent experiments  $p= 0.0281$ ). Data are presented as mean values  $\pm$ SEM. Statistical significance was determined by unpaired Student's *t* test (two groups) with  $p<0.05$  considered statistically significant. \* represents  $p<0.05$ ; \*\* represents  $p<0.01$ ; \*\*\* represents  $p<0.001$ ; \*\*\*\* represents  $p<0.0001$ . Source data are provided as a Source Data file.

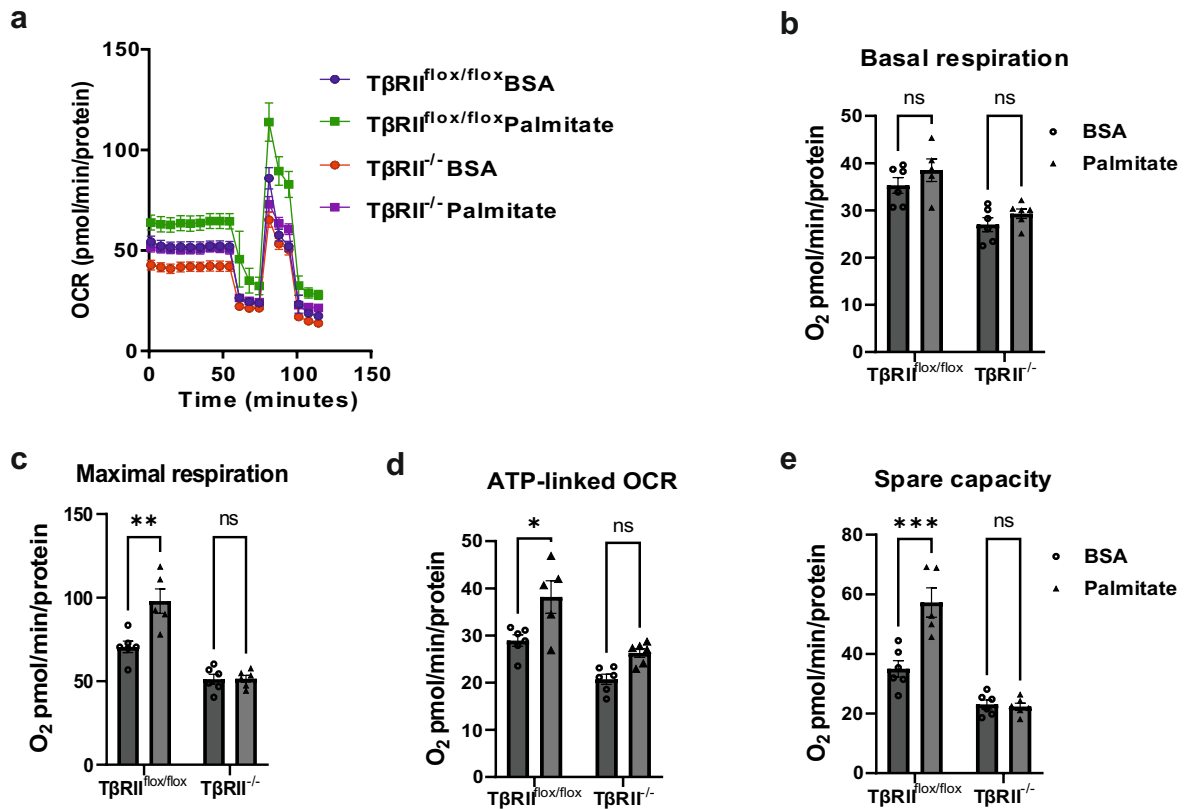

**Supplementary Fig. 6:** Supplementary Fig. 2: Seahorse analysis of fatty acid metabolism indicating impaired fatty acid oxidation in PT cells lacking  $T\beta RI I$  as reflected by respiration (basal and maximal), spare capacity and ATP-linked OCR ( $n=3$  independent biological replicates). (C)  $p= 0.0012$ ; (d)  $p= 0.0117$  and (e)  $p= 0.0001$ . Data are presented as mean values  $\pm$ SEM. Statistical significance was determined by 2 way ANOVA followed by Sidak's multiple comparisons test with  $p<0.05$  considered statistically significant. Dots represent the number of animals per group. \* represents  $p<0.05$ ; \*\* represents  $p<0.01$  \*\*\* $p<0.001$ . Source data are provided as a Source Data file.

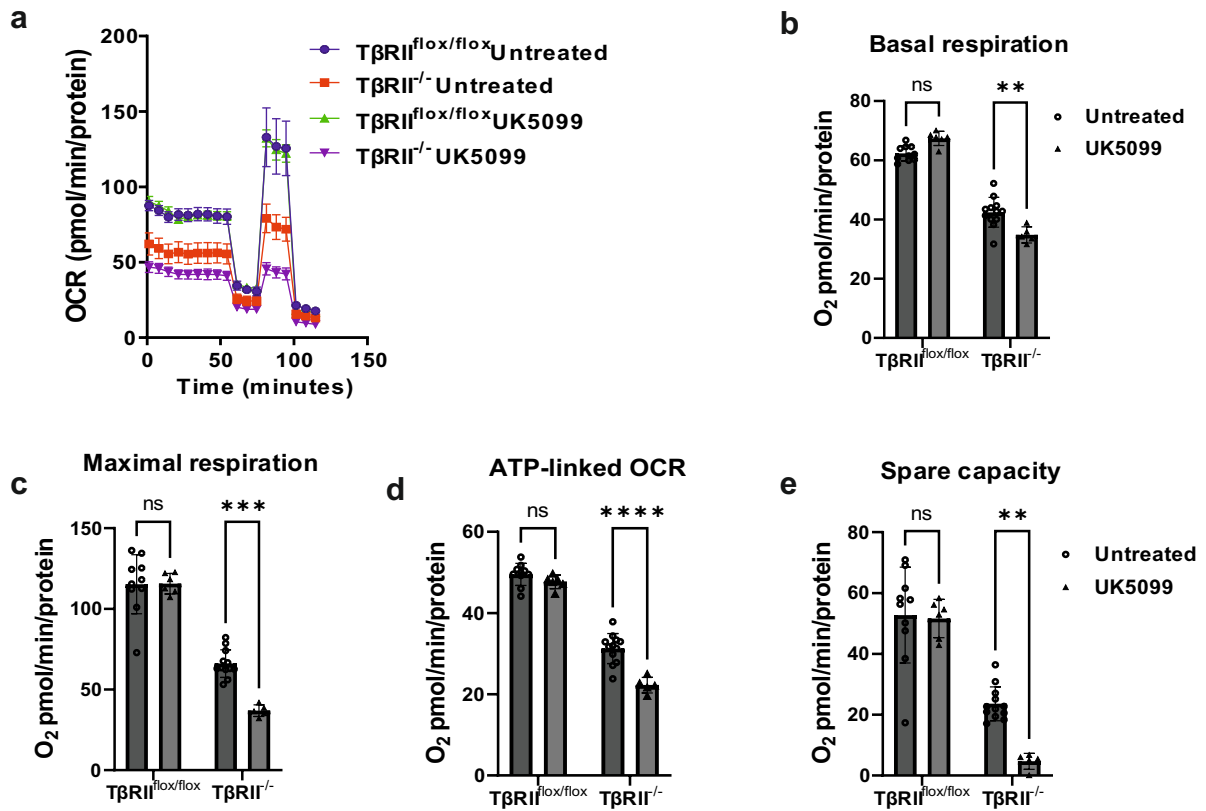

**Supplementary Fig. 7:** Seahorse analyses of substrate dependency indicating increased glycolytic dependency in  $T\beta RI I^{-/-}$  compared to  $T\beta RI I^{flox/flox}$  PT cells as reflected by respiration (basal and maximal), spare capacity and ATP-linked OCR (n=3 independent biological replicates). Data are presented as mean values  $\pm$ SEM. Statistical significance was determined by 2 way ANOVA followed by Sidak's multiple comparisons test with  $p < 0.05$  considered statistically significant. (b) Basal respiration (\*\* $p = 0.0033$ ). (c) Maximal respiration (\*\* $p = 0.0004$ ). (d) ATP-linked OCR (\*\*\*\* $p < 0.0001$ ). (e) Spare capacity (\*\* $p = 0.0066$ ). \* represents  $p < 0.05$ ; \*\* represents  $p < 0.01$ . Source data are provided as a Source Data file.

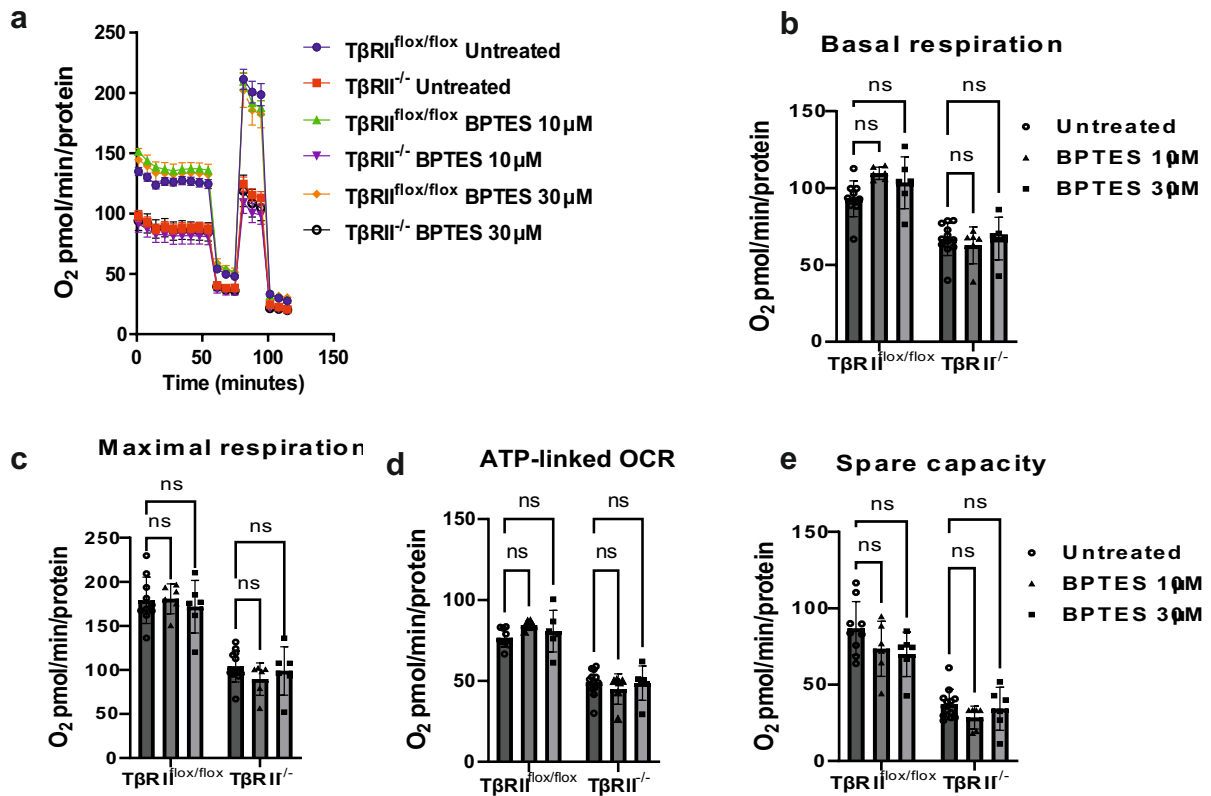

**Supplementary Fig. 8:** (a-e) Seahorse analysis of substrate dependency indicating absence of glutamine oxidation dependency in PT cells as reflected by respiration (basal and maximal), spare capacity and ATP-linked OCR (n=3 independent biological replicates). Data are presented as mean values ±SEM. Statistical significance was determined by 2 way ANOVA followed by Sidak's multiple comparisons test with p<0.05 considered statistically significant. Source data are provided as a Source Data file.

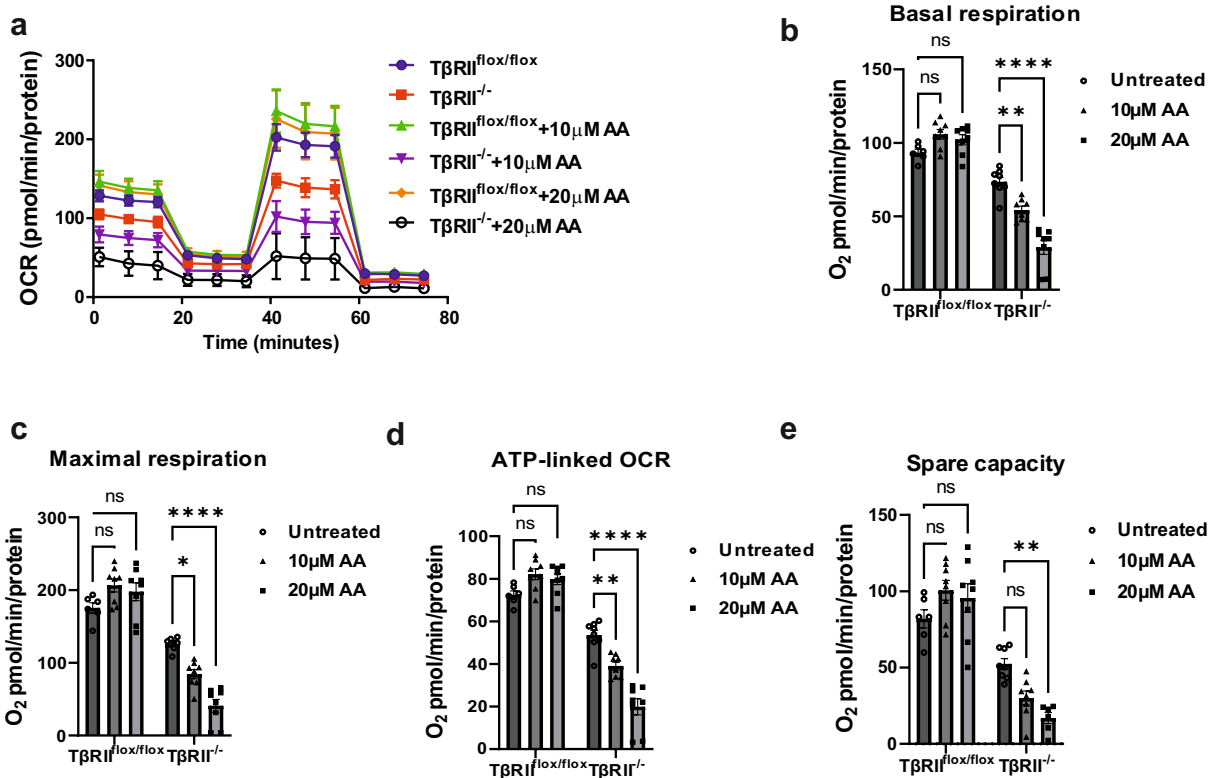

**Supplementary Fig. 9:** Proximal tubule  $T\beta RI I$  deletion increases susceptibility to AA induced mitochondrial dysfunction. (a-e) Treatment of  $T\beta RI I^{-/-}$  PT cells with AA (10 or 20  $\mu M$ ) decreased respiration (basal and maximal), spare capacity and ATP-linked OCR compared to  $T\beta RI I^{flox/flox}$  PT cells ( $n=3$  independent biological replicates). Data are presented as mean values  $\pm$ SEM. Statistical significance was determined by 2 way ANOVA followed by Sidak's multiple comparisons test with  $p<0.05$  considered statistically significant. (b) Basal respiration (\*\* $p=0.0039$  and \*\*\*\* $p<0.0001$ ). (c) Maximal respiration (\* $p=0.0141$  and \*\*\*\* $p<0.0001$ ). (d) ATP-linked OCR (\*\* $p=0.0041$  and \*\*\*\* $p<0.0001$ ). (e) Spare capacity (\*\* $p=0.0052$ ). \* represents  $p<0.05$ ; \*\*\* represents  $p<0.001$ . Source data are provided as a Source Data file.





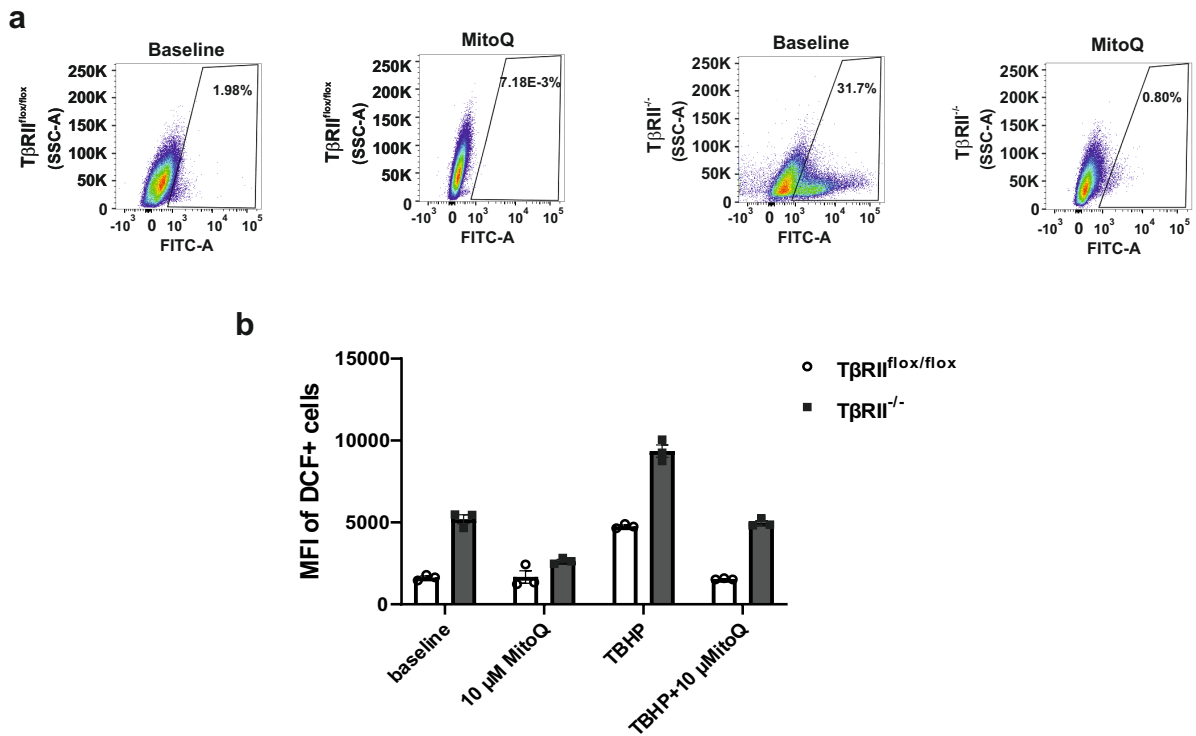

**Supplementary Fig. 11:** FACS analysis plots and quantification ROS in PT cells treated or not with 10  $\mu\text{M}$  MitoQ. MitoQ treatment decreased ROS in  $\text{T}\beta\text{RII}^{-/-}$  PT cells to the level of  $\text{T}\beta\text{RII}^{\text{flx/flx}}$  PT cells, but did not affect basal ROS production in  $\text{T}\beta\text{RII}^{\text{flx/flx}}$  PT cells. Tert-Butyl hydroperoxide (TBHP) was used as positive control (3 biological replicates). Data are presented as mean values  $\pm$ SEM. The dots represent biological replicates. Source data are provided as a Source Data file.

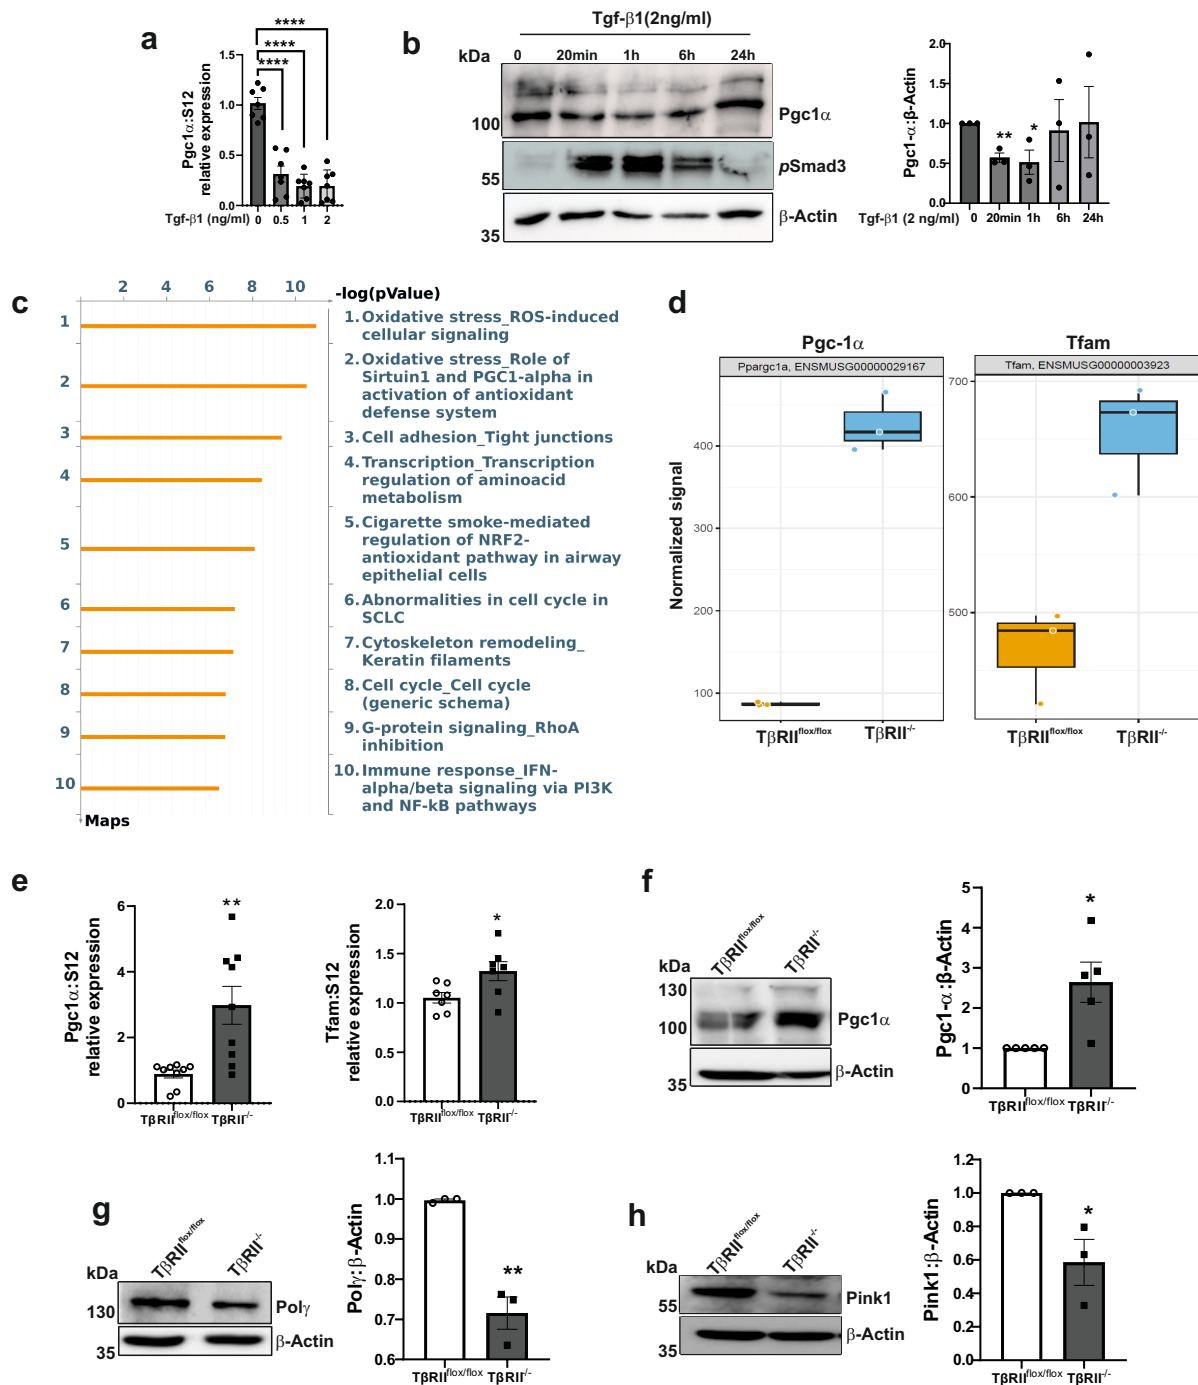

**Supplementary Fig. 12:** Effect of proximal tubule TGF- $\beta$  signaling on Pgc1 $\alpha$ , Pol $\gamma$  and Pink1. (a) Dose-dependent effect of TGF- $\beta$  on T $\beta$ RII<sup>fllox/fllox</sup> PT cell Pgc1 $\alpha$  mRNA levels measured by RT-qPCR and normalized to S12 mRNA levels (n=7 independent biological replicates, p<0.0001). (b) Immunoblotting and quantification showing the association of transient activation of TGF- $\beta$  signaling (p-Smad3) with transient repression of Pgc1 $\alpha$  protein induced by 2 ng/ml TGF- $\beta$ 1.  $\beta$ -Actin was used as loading and blotting control (n=3 independent experiments, \*p= 0.0328 and \*\*p= 0.0018). (c) Overrepresentation analysis using Metacore showing the top 10 significantly

affected in  $T\beta RII^{-/-}$  compared to  $T\beta RII^{flox/flox}$  PT cells. (d) RNAseq normalized  $Pgc1\alpha$  and  $Tfam$  signals were strikingly increased in  $T\beta RII^{-/-}$  ( $Pgc1\alpha$ ; minima= 395.6, center= 416.8, maxima= 465.2 and  $Tfam$ ; minima=601.7, center= 673.1, maxima= 692.1) compared to  $T\beta RII^{flox/flox}$  PT cells ( $Pgc1\alpha$ ; minima= 85.5, center= 86.1, maxima= 89.3 and  $Tfam$ ; minima= 421.1, center= 484.4, maxima= 497); n=3 independent biological replicates. (e)  $Pgc1\alpha$  and  $Tfam$  mRNA levels measured by RT-qPCR and normalized to the mRNA levels of  $S12$  showing basal increase in  $T\beta RII^{-/-}$  compared to  $T\beta RII^{flox/flox}$  PT cells (n=9 independent experiments for  $Pgc1\alpha$ ,  $p= 0.0026$ ) and (n=7 independent experiments for  $Tfam$ ,  $p= 0.0308$ ). (f) Immunoblotting and quantification showing basal increase of  $Pgc1\alpha$  protein expression in  $T\beta RII^{-/-}$  PT cells as compared to  $T\beta RII^{flox/flox}$  PT cells (n=3 independent experiments,  $p=0.0112$ ). (g) Immunoblotting and quantification showing basal decrease of  $Pol\gamma$  protein expression in  $T\beta RII^{-/-}$  compared to  $T\beta RII^{flox/flox}$  PT cells (n=3 independent experiments,  $p=0.0022$ ). (h) Immunoblotting and quantification showing basal decrease of  $Pink1$  protein expression in  $T\beta RII^{-/-}$  compared to  $T\beta RII^{flox/flox}$  PT cells.  $\beta$ -Actin was used as loading and blotting control (n=3 independent experiments,  $p=0.0391$ ). Data are presented as mean values  $\pm$ SEM. Statistical significance was determined by unpaired Student's  $t$  test (two groups) with  $p<0.05$  considered statistically significant. \* represents  $p<0.05$ ; \*\* represents  $p<0.01$ ; \*\*\*\* represents  $p<0.0001$ . Source data are provided as a Source Data file.

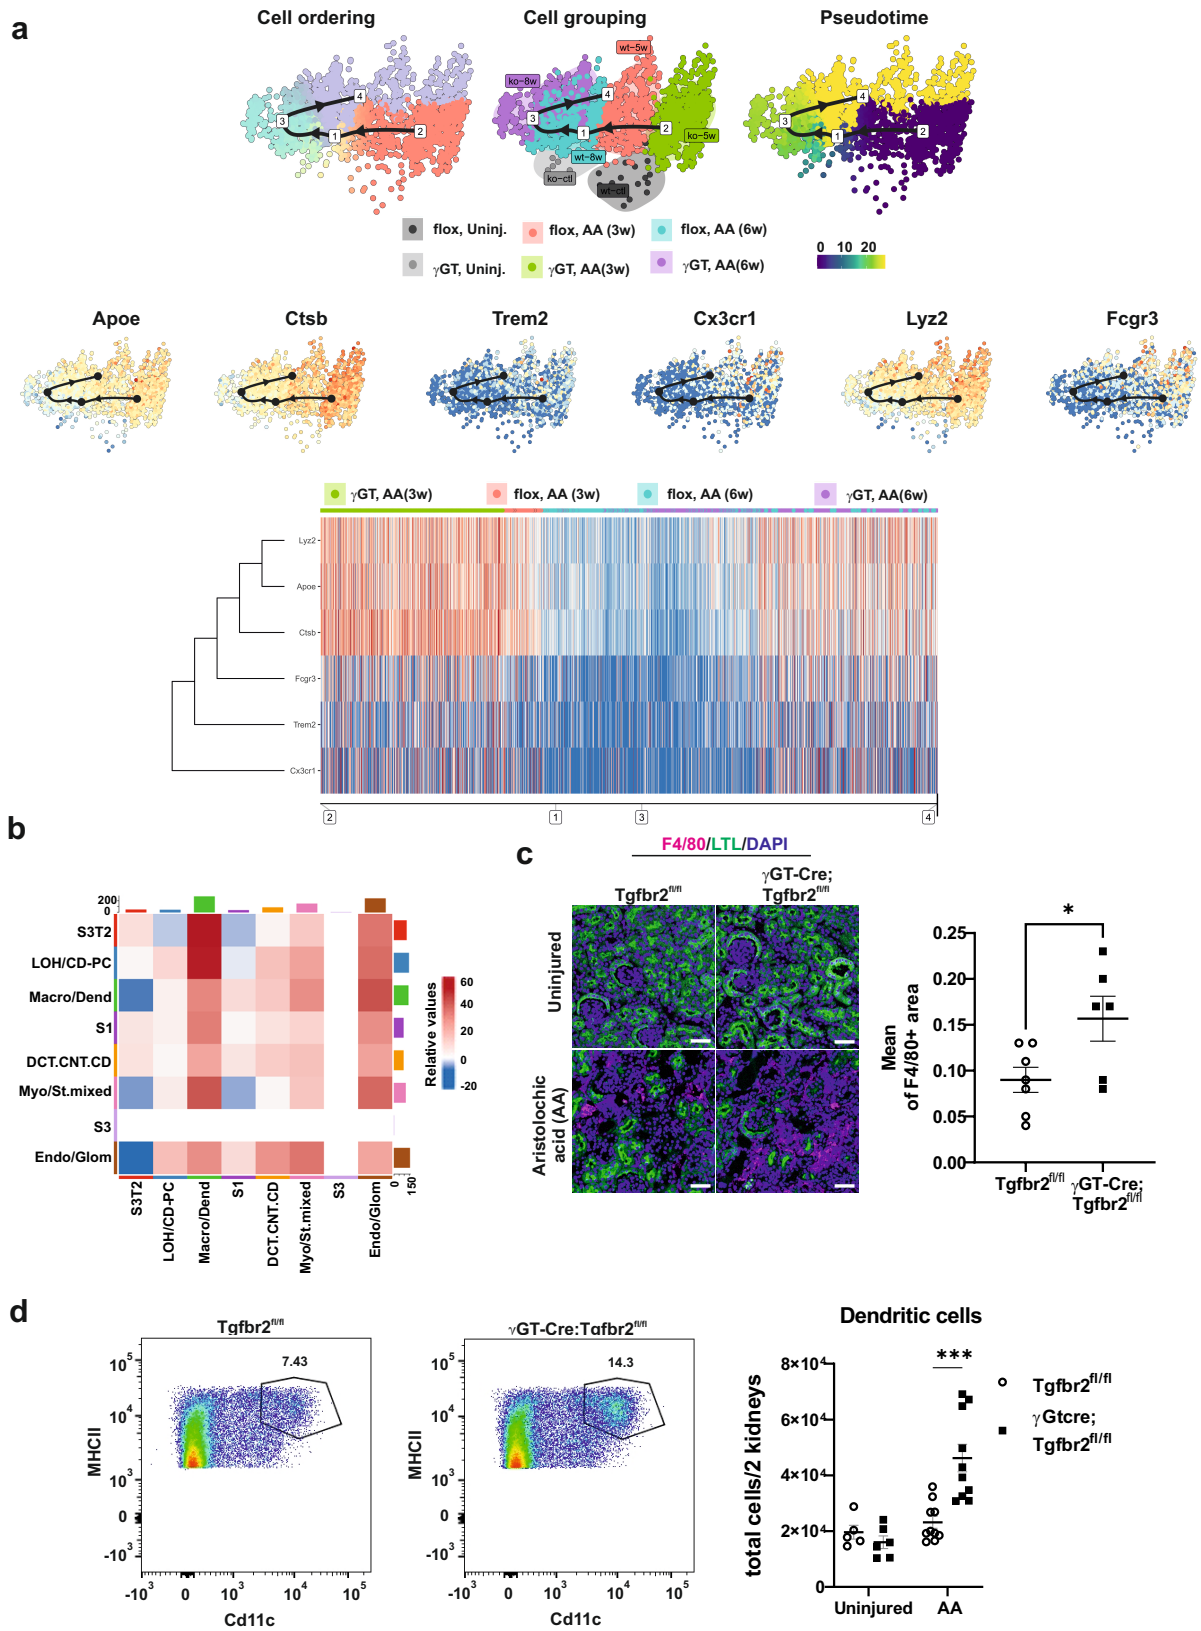

**Supplementary Fig. 13:** Proximal tubule T $\beta$ RII deletion increases tubular-macrophage/dendritic cells interaction and infiltrates 3 weeks after AA injury. (a) Trajectory inference performed on *Myo/str. mixed* clusters reveals increased macrophages markers in the



dataset  $\gamma$ GT-Cre;Tgfb $r2^{fl/fl}$  3 weeks after AA injury compared to other conditions (3 weeks Tgfb $r2^{fl/fl}$ , 6 weeks  $\gamma$ GT-Cre;Tgfb $r2^{fl/fl}$  and 6 weeks Tgfb $r2^{fl/fl}$ ). The trajectory diagram and heat map show macrophage marker expression at each injury time points. (b) Heat map of cluster interactions, analyzed with Cellchat database of LR pairs, showing increased S3T2 cells interaction with *Macro/Dend.* cells in  $\gamma$ GT-Cre;Tgfb $r2^{fl/fl}$  compared to Tgfb $r2^{fl/fl}$  datasets 3 weeks after AA injury. (c) Representative immunofluorescence images and quantification of F4/80 showing increased macrophage infiltrates in renal cortices of  $\gamma$ GT-Cre;Tgfb $r2^{fl/fl}$  mice compared to their Tgfb $r2^{fl/fl}$  littermates 3 weeks after AA injury. Lotus tetragonolobus lectin (LTL) is used as proximal tubule's marker; n=7 (Tgfb $r2^{fl/fl}$ ) and 6 ( $\gamma$ GT-Cre;Tgfb $r2^{fl/fl}$ ) mice,  $p=0.0307$ . (d) FACS analysis of renal interstitial cells showing increased numbers of dendritic cells in the kidneys of  $\gamma$ GT-Cre;Tgfb $r2^{fl/fl}$  mice compared to those from their Tgfb $r2^{fl/fl}$  littermates 3 weeks after AA injury (n=5 uninjured, 10 injured (Tgfb $r2^{fl/fl}$ ) and 6 uninjured, 10 injured  $\gamma$ GT-Cre;Tgfb $r2^{fl/fl}$  mice, injured  $p=0.0002$ ). Data are presented as mean values  $\pm$ SEM. Statistical significance was determined by unpaired Student's  $t$  test (two groups) or 2 way ANOVA followed by Sidak's multiple comparisons test with  $p<0.05$  considered statistically significant. Dots represent the number of animals per group. \* represents  $p<0.05$ ; \*\*\* $p<0.001$ . Source data are provided as a Source Data file.

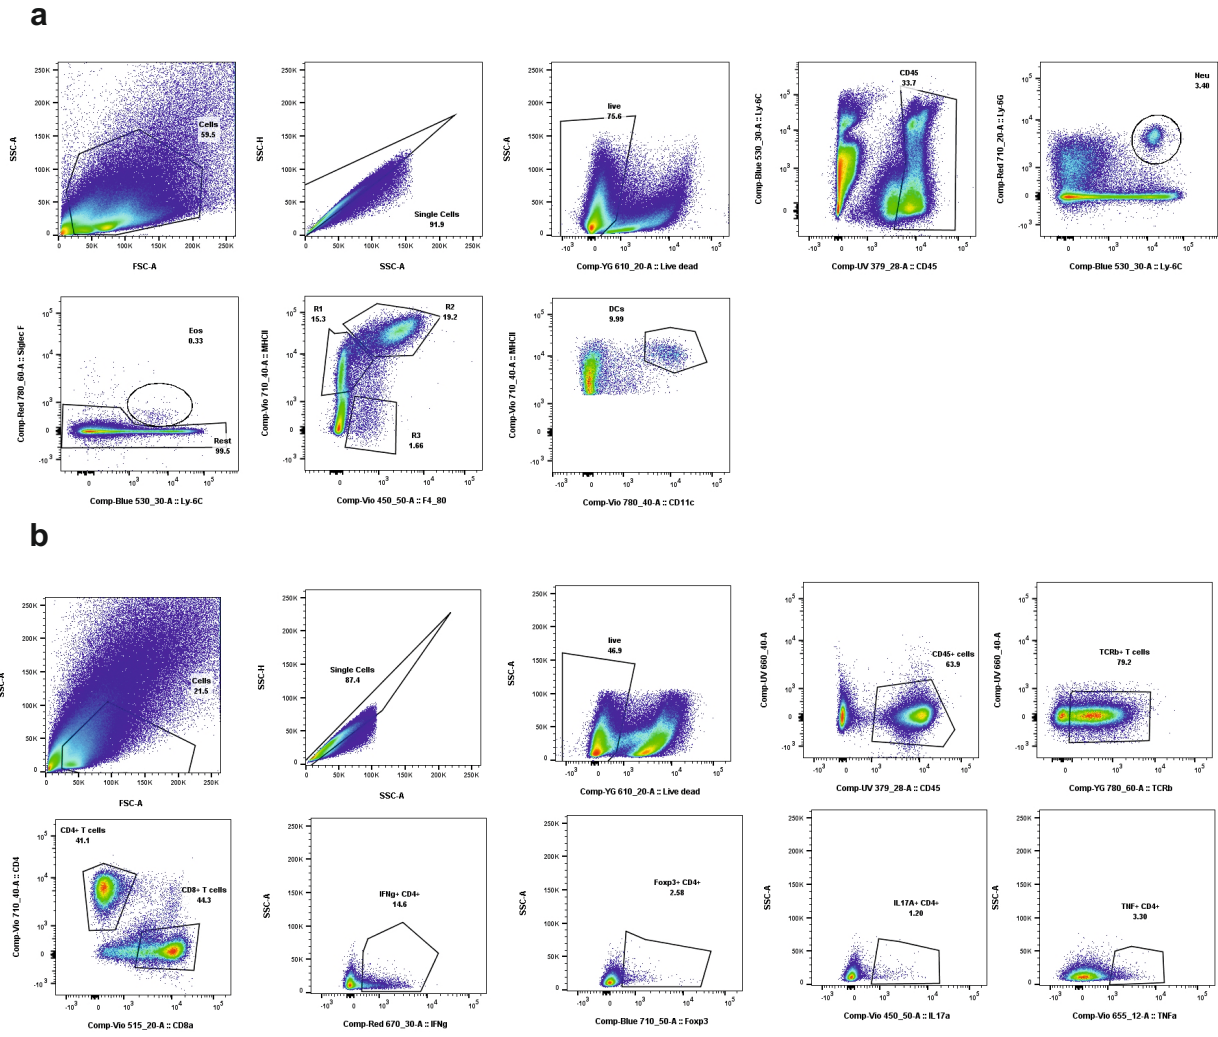

**Supplementary Fig. 14:** Myeloid and lymphoid cell FACS gating strategies. (a). Myeloid cells gating strategy depicting identification of dendritic cell and other cell types. (b) Lymphoid cells gating strategy showing identification of CD4+, CD8+ and their subpopulations.

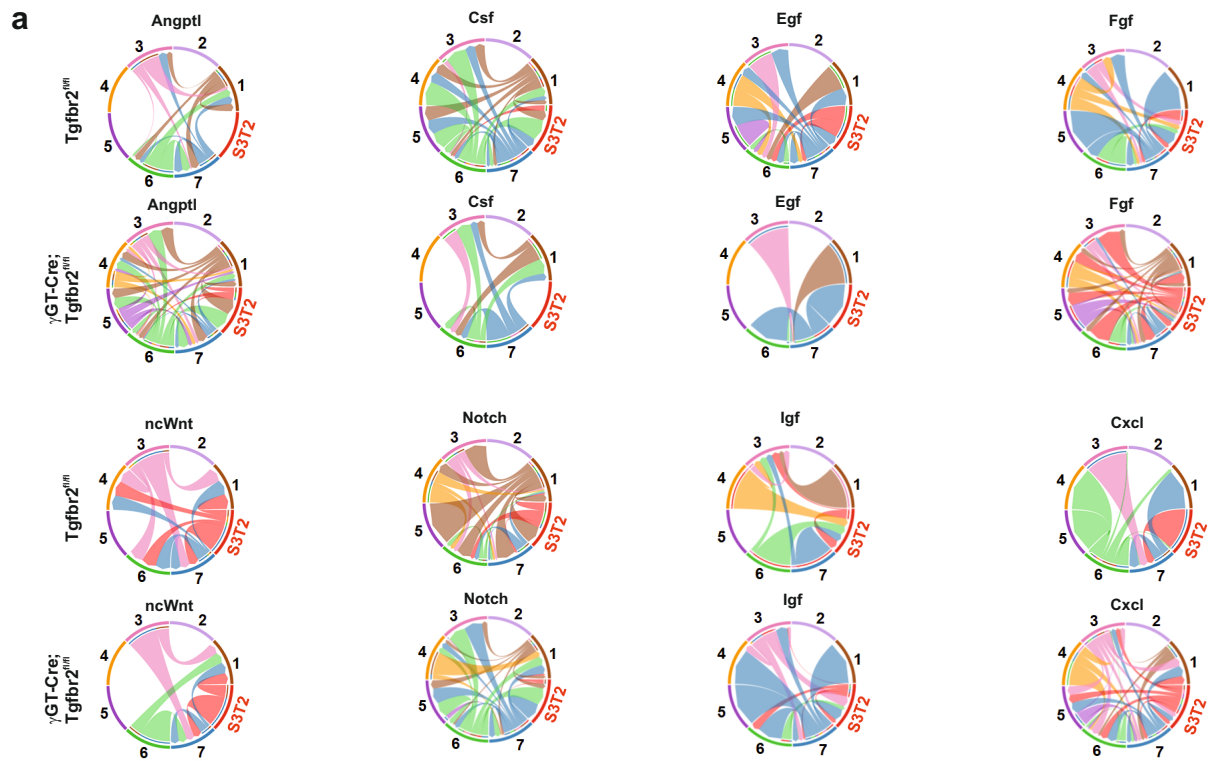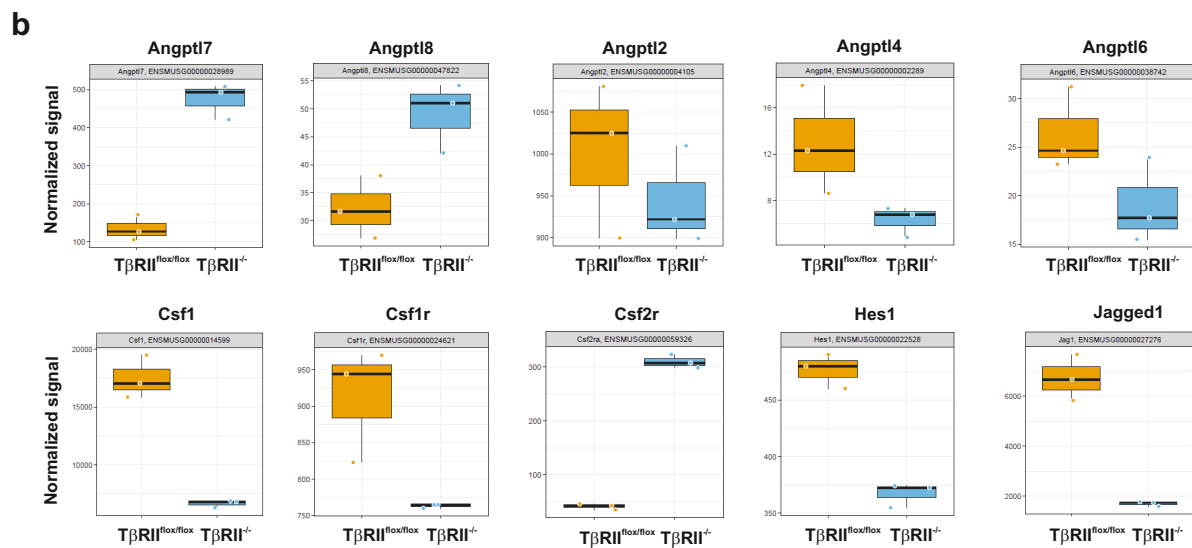

**Supplementary Fig. 15:** Cellchat analyses of differentially expressed genes involved in S3T2-*Macro/dend.* interactions. (a) Diagram showing factors mediating outgoing and incoming interactions between clusters. (b) RNAseq normalized signals of selected adaptive and maladaptive factors (Minima, center and maxima values are in Source Data file; n= 3 independent biological replicates). Numbers are 1: endothelial and glomerular cells (Endo/Glom); 2: S3 PT cells; 3: myofibroblasts and stromal cells (Myo/St. mixed); 4: distal convoluted tubular, connecting and intercalated cells (DCT.CNT.CD-IC); 5: S1 PT cells; 6: macrophages and dendritic cells (Macro/Dend.); 7: loop of Henle and principal cells (LOH/CD-

PC). Source data are provided as a Source Data file.

**a**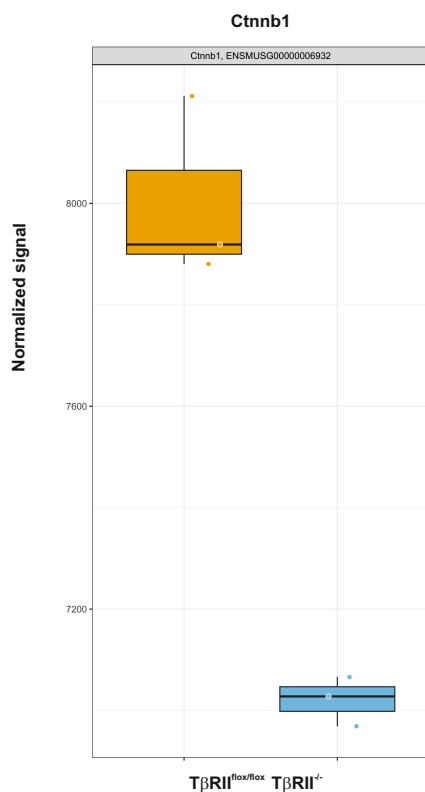**b**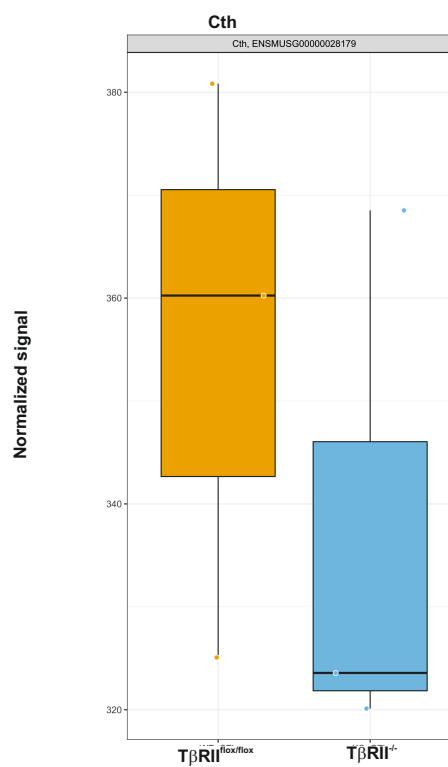

**Supplementary Fig. 16:** (a, b) Potential adaptive factors,  $\beta$ -catenin (Ctnnb1) and Cystathionase (Cth) are decreased in T $\beta$ RII<sup>-/-</sup> (Ctnnb1; minima= 6969, center= 7027.9, maxima= 7066 and Cth; minima= 320.1, center= 323.6, maxima= 368.5) compared to T $\beta$ RII<sup>flx/flx</sup> PT cells (Ctnnb1; minima= 7880.6, center= 7919, maxima= 8211.5 and Cth; minima= 325.1, center= 360.2, maxima= 380.8) as assessed by RNAseq (n=3 independent biological replicates). Source data are provided as a Source Data file.



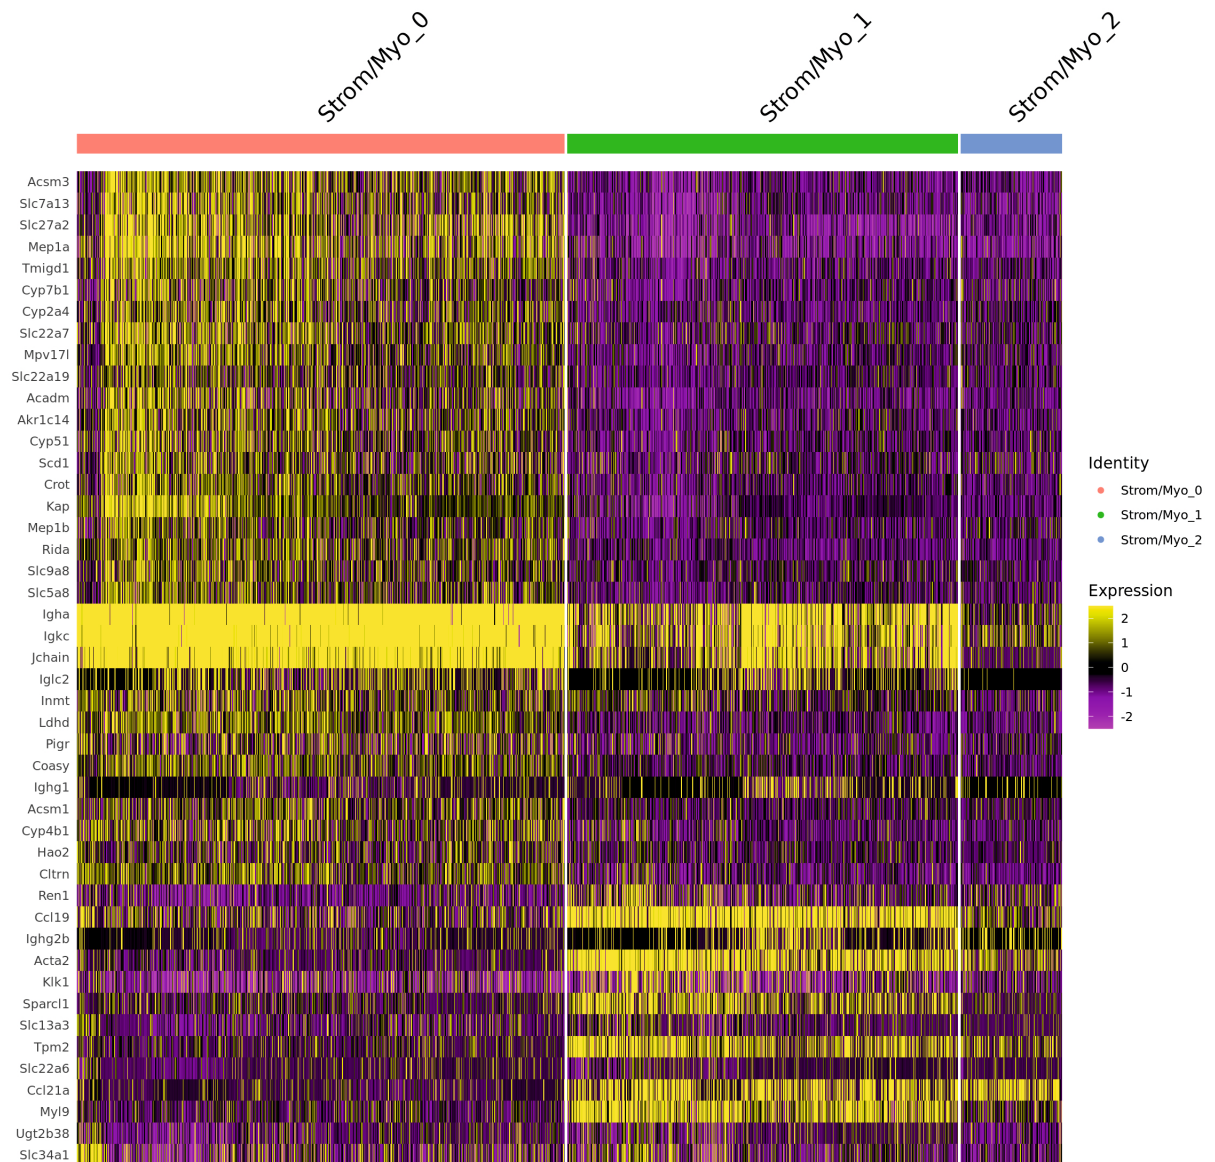

**Supplementary Fig. 17:** Sub-clustering analysis of *Myo/Str. mixed* identified 3 subpopulations.

Heatmap showing the 3 sub-populations (Strom/Myo\_0, Strom/Myo\_1 and Strom/Myo\_2) and significantly up and down-regulated markers per subgroups.

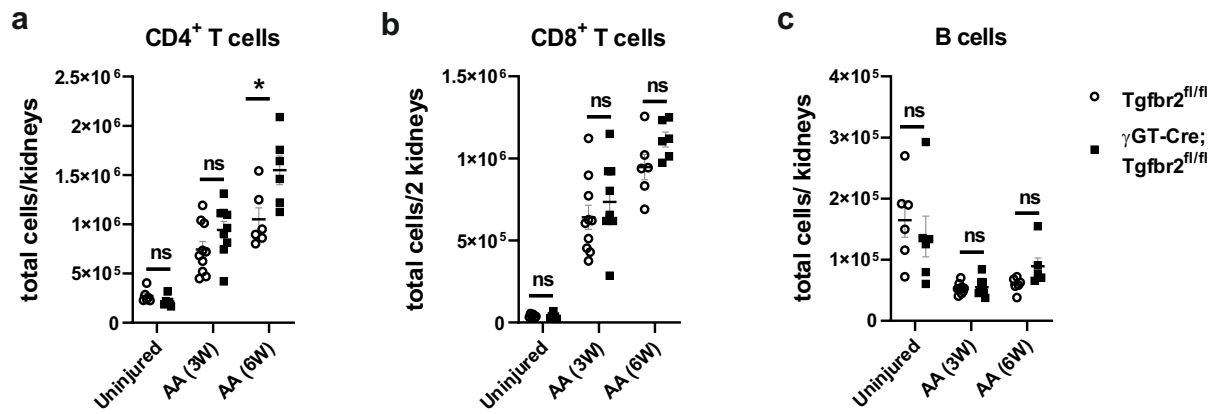

**Supplementary Fig. 18:** (a-c) FACS analyses of renal leukocytes showing no significant difference of leukocytes 3 weeks after AA injury and significant increase of CD4<sup>+</sup> T cell number in kidneys of  $\gamma$ GT-Cre;Tgfr2<sup>fl/fl</sup> mice compared to those from their Tgfr2<sup>fl/fl</sup> littermates 6 weeks after AA injury. CD8<sup>+</sup> T cell numbers were increased in Tgfr2<sup>fl/fl</sup> compared to  $\gamma$ GT-Cre;Tgfr2<sup>fl/fl</sup> kidneys, but did not reach statistical significance 6 weeks after AA injury. Uninjured (n= 6 Tgfr2<sup>fl/fl</sup> and 6  $\gamma$ GT-Cre;Tgfr2<sup>fl/fl</sup>), 3 weeks (n= 9 Tgfr2<sup>fl/fl</sup> and 8  $\gamma$ GT-Cre;Tgfr2<sup>fl/fl</sup>) and 6 weeks (n=6 Tgfr2<sup>fl/fl</sup> and 6  $\gamma$ GT-Cre;Tgfr2<sup>fl/fl</sup>, CD4<sup>+</sup> T cells  $p=0.0205$ ) mice. Data are presented as mean values  $\pm$ SEM. Statistical significance was determined by 2 way ANOVA followed by Sidak's multiple comparisons test with  $p<0.05$  considered statistically significant. The dots represent the number of animals per group. \* $p$  represents  $<0.05$ . Source data are provided as a Source Data file.

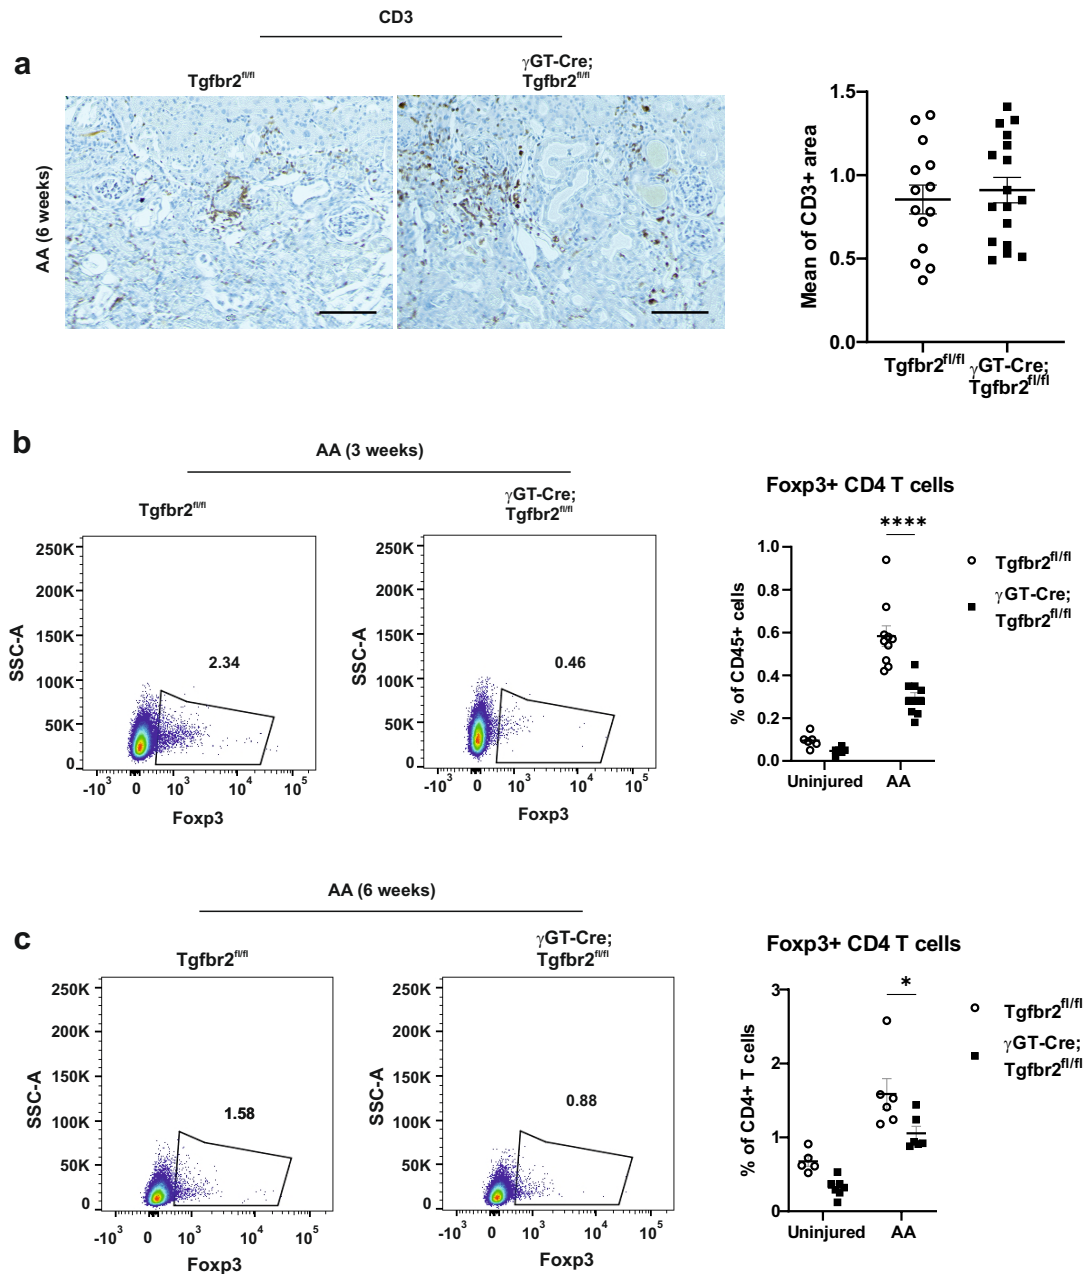

**Supplementary Fig. 19:** Proximal tubule TβRII deletion decreases the number of Foxp3+ CD4 T cells after AA induced injury. (a) Representative image and quantification showing no difference in CD3+ cell infiltrate in renal cortices of γGT-Cre;Tgfr2<sup>fl/fl</sup> and floxed littermate mice; n=14 (Tgfr2<sup>fl/fl</sup>) and 17 (γGT-Cre;Tgfr2<sup>fl/fl</sup>) mice. Scale bars represent 200 μm. (b, c) FACS analyses of the Foxp3+ CD4 T cell percentage of the CD45+ cells 3 weeks (n=6 uninjured, 10 injured Tgfr2<sup>fl/fl</sup> and 6 uninjured, 10 injured γGT-Cre;Tgfr2<sup>fl/fl</sup> mice, injured  $p < 0.0001$ ) (b) and 6 weeks (n=5 uninjured, 6 injured Tgfr2<sup>fl/fl</sup> and 7 uninjured, 6 injured γGT-Cre;Tgfr2<sup>fl/fl</sup> mice, injured  $p = 0.0328$ ) (c) after AA injury. Data are presented as mean values ± SEM. Statistical significance was determined by unpaired Student's *t* test (two groups) or 2 way ANOVA followed

by Sidak's multiple comparisons test with  $p < 0.05$  considered statistically significant. The dots represent the number of animals per group. \* represents  $p < 0.05$ ; \*\*\*\* represents  $p < 0.0001$ . Source data are provided as a Source Data file.

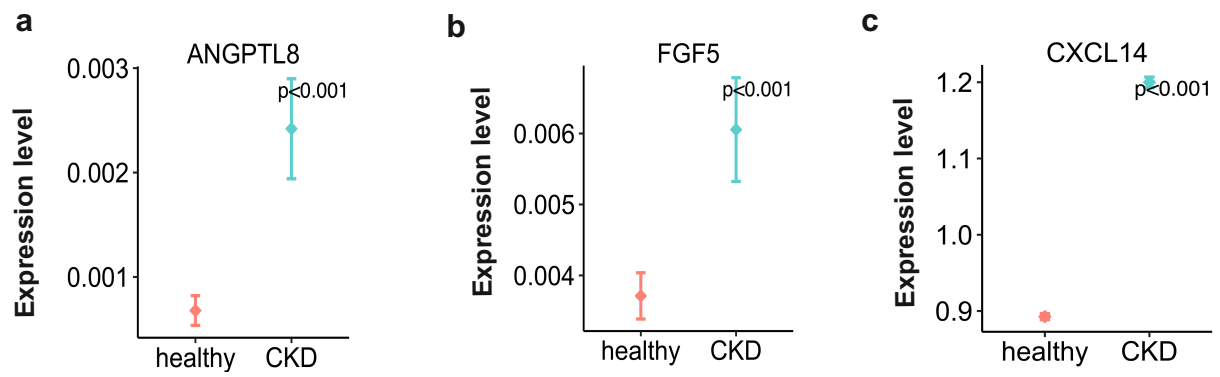

**Supplementary Fig. 20:** (a-c) Differential gene expression analysis showing a significant increase of potential maladaptive factors (ANGPTL8, FGF5 and CXCL14) in CKD PT cells as compared to healthy PT cells from the snRNAseq online database. N= 5 CKD patients (eGFR<60) and 3 healthy controls. Differential gene expression was evaluated using the Wilcoxon Rank Sum test from the *FindMarkers* function. (a)  $p = 0.000003$ ; (b)  $p = 0.00093617$  and (c)  $p = 0$ . Source data are provided as a Source Data file.

## Used Reagents and Antibodies

|                                          | Company                   | Cat. number                     | Dilution |
|------------------------------------------|---------------------------|---------------------------------|----------|
| <b>AA Injury Models</b>                  |                           |                                 |          |
| Aristolochic acid                        | Sigma                     | A9451                           |          |
| <b>Staining</b>                          |                           |                                 |          |
| 10% Formalin                             | Sigma                     | HT501128                        |          |
| Oil red O                                | Sigma                     | O0625                           |          |
| Sirius red                               | Waldeck, Münster, Germany |                                 |          |
| H&E Staining Kit (Hematoxylin and Eosin) | Abcam                     | ab245880                        |          |
| VECTASTAIN Elite ABC Kit                 | Vector Laboratories       | PK-6200                         |          |
| H2O2                                     | Sigma                     | H1009                           |          |
| DAB                                      | Vector Laboratories       | SK-4105-L120                    |          |
| Citrate Buffer                           | Sigma                     | C9999                           |          |
| Normal goat serum                        | Jackson Immuno research   | 005-000-121                     |          |
| Normal donkey serum                      | Jackson Immuno research   | 017-000-122                     |          |
| LowCross-Buffer                          | Candor                    | 100 050                         |          |
| Antifade Monting medium with Dapi        | Vector Laboratories       | H-1800                          |          |
| <b>Spatial transcriptomics</b>           |                           |                                 |          |
| Visium Spatial Gene Expression           | 10X Genomics              |                                 |          |
| DNA 12000 Kit                            | Agilent                   | 5067-1508                       |          |
| High Sensitivity D5000 ScreenTape        | Agilent                   | 5067-5592                       |          |
| High Sensitivity D5000 Reagents          | Agilent                   | 5067-5593                       |          |
| SPRiselect Reagent                       | Beckman Coulter           | 4700273718                      |          |
| <b>Flow cytometry</b>                    |                           |                                 |          |
| Collagenase IV                           | Worthington               | LS004188                        |          |
| Percoll                                  | Sigma-Aldrich             | GE17-0891                       |          |
| <b>Mitochondria fractionation</b>        |                           |                                 |          |
| Cell mitochondria isolation kit          | ThermoFisher              | 89874                           |          |
| Protease inhibitor cocktail              | Roche                     | 11697498001                     |          |
| <b>Cell culture</b>                      |                           |                                 |          |
| DMEM/F12                                 | Corning                   | 10-092-CV                       |          |
| FBS                                      | Gibco                     | 10270-106                       |          |
| <b>PT supplements</b>                    |                           |                                 |          |
| Hydrocortisone                           | Sigma Aldrich             | H0135                           |          |
| ITS (insulin/transferrin/selenium)       | Sigma Aldrich             | I1884-1                         |          |
| T3                                       | Sigma Aldrich             | T5516                           |          |
| Interferon-gamma                         | Sigma Aldrich             | I4777                           |          |
| TGF-beta 1 Protein                       | R&D Systems               | 101-B1-001/CF<br>7754-BH-005/CF |          |

**Seahorse**

|                                            |                   |            |
|--------------------------------------------|-------------------|------------|
| Palmitate Oxidation Stress Test Kit        | Bucher            | 103693-100 |
| Mito Stress Test Kit                       | Bucher            | 103015-100 |
| Glucose/Pyruvate Oxidation Stress Test Kit | Bucher            | 103673-100 |
| Glutamine Oxidation Stress Test Kit        | Bucher            | 103674-100 |
| L-carnitine                                | Agilent           | 6496363    |
| Etomoxir                                   | Sigma             | E1905      |
| Oligomycin                                 | Sigma             | 75351      |
| FCCP                                       | Sigma             | C2920      |
| Rotenone/Antimycin                         | Sigma             | R8875      |
| BPTES                                      | Sigma             | SML0601    |
| UK5099                                     | Sigma             | PZ0160     |
| Passive lysis buffer                       | Promega           | E1941      |
| Bradford Assay reagents                    | Biorad            | 5000002    |
| Pierce BCA Protein Assay A                 | Thermo Scientific | 23228      |
| Pierce BCA Protein Assay B                 | Thermo Scientific | 1859078    |

**ATP, Lactate and NAD<sup>+</sup>/NADH assay**

|                              |         |       |
|------------------------------|---------|-------|
| ATP assay                    | Promega | G7570 |
| Lactate assay                | Promega | J5021 |
| NAD <sup>+</sup> /NADH assay | Promega | G9071 |

**DCFDA assay**

|                  |                    |                |
|------------------|--------------------|----------------|
| MitoQ            | Focus Biomolecules | 10-1363-25     |
| NAD <sup>+</sup> | Sigma-Aldrich      | N8285<br>N1636 |

**qPCR**

|                                  |                |           |
|----------------------------------|----------------|-----------|
| Nucleospin RNA extraction kit    | Macherey Nagel | 740955.25 |
| AffinityScript Multi-Temp RT kit | Agilent        | 600107    |
| KAPA SYBR FAST                   | Roche          | KK4618    |

**Immunoblotting**

|                              |             |                |
|------------------------------|-------------|----------------|
| EDTA                         | Sigma       | 27285          |
| NP-40 Substitute             | Sigma       | 74385          |
| Na3VO4                       | Sigma       | S6508          |
| Protease inhibitor cocktails | Roche       | 11 836 170 001 |
| PMSF                         | Sigma       | P 7626         |
| Aprotinin                    | Sigma       | A1153          |
| Leupeptin                    | Sigma       | L2884          |
| Pepstatin                    | Sigma       | P 4265         |
| BSA                          | Carl Roth   | 8076.4         |
| HRP substrate                | PerkinElmer | NEL113001EA    |

**Antibodies****IF/IHC**

|                             |                     |         |       |
|-----------------------------|---------------------|---------|-------|
| Pgc1a (Monoclonal, 4C1.3)   | Merck               | ST1202  | 1:500 |
| CD3 (Monoclonal, SP7)       | Abcam               | ab16669 | 1:150 |
| F4/80 (Monoclonal, Cl:A3-1) | Abcam               | ab6640  | 1:150 |
| Kim-1 (Polyclonal)          | R&D Systems         | AF1817  | 1:200 |
| LTL                         | Vector Laboratories | FL-1321 | 1:400 |
| Secondary AB, Alexa fluor   | Life technology     |         |       |

### Immunoblotting

|                                                |                |              |         |
|------------------------------------------------|----------------|--------------|---------|
| Pink1 (Polyclonal)                             | Novus          | BC100-494    | 1:1000  |
| LC3A (Monoclonal, D50G8)                       | Cell Signaling | 4599S        | 1:500   |
| Pgc1a (Monoclonal, 4C1.3)                      | Merck          | ST1202       | 1:500   |
| Phospho-Smad3 (Polyclonal)                     | Rockland       | 600-401-919  | 1:500   |
| Polg (Monoclonal, G-6)                         | Santa Cruz     | sc-390634    | 1:200   |
| Tom20 (Polyclonal)                             | Santa Cruz     | sc-11415     | 1:1000  |
| alpha-tubulin (Monoclonal, GT114)              | GenTex         | GTX628802-01 | 1:4000  |
| Beta-actin (Monoclonal, AC-15)                 | Sigma          | A5441        | 1:20000 |
| Total OXPHOS Antibody Cocktail (5 mAbs)        | Abcam          | ab110413     | 1:1000  |
| Anti-NDUFB8 antibody [20E9DH10C12] (ab110242)  |                |              |         |
| Anti-SDHB antibody [21A11AE7] (ab14714)        |                |              |         |
| Anti-UQCRC2 antibody [13G12AF12BB11] (ab14745) |                |              |         |
| Anti-MTCO1 antibody [1D6E1A8] (ab14705)        |                |              |         |
| Anti-ATP5A antibody [15H4C4] (ab14748)         |                |              |         |
| polyclonal goat anti-rabbit-HRP                | Pierce         | 31430        |         |
| polyclonal goat anti-mouse-HRP                 | Pierce         | 31460        |         |



| <b>List of antibodies used in FACS</b> |               |              |                 |              |                       |
|----------------------------------------|---------------|--------------|-----------------|--------------|-----------------------|
| <b>Fluorochrome</b>                    | <b>Target</b> | <b>Clone</b> | <b>Reseller</b> | <b>Cat #</b> | <b>Dilution (1/x)</b> |
| BUV395                                 | CD45          | 30-F11       | BD Horizon      | 564279       | 300                   |
| BV785                                  | CD11c         | N418         | BioLegend       | 117336       | 300                   |
| BV711                                  | MHC II        | M5/114.15.2  | BioLegend       | 107643       | 1000                  |
| BV650                                  | XCR1          | ZET          | BioLegend       | 148220       | 200                   |
| BV605                                  | SA            | streptavidin | BioLegend       | 405229       | 300                   |
| BV510                                  | CD11b         | M1/70        | BioLegend       | 101263       | 100                   |
| PerCP-Cy5.5                            | MGL2          | URA1         | BioLegend       | 146810       | 300                   |
| FITC                                   | Ly-6C         | HK1.4        | BioLegend       | 128006       | 300                   |
| PE-Cy7                                 | CD103         | 2E7          | BioLegend       | 121426       | 200                   |
| PE                                     | PDL2          | TY25         | BioLegend       | 107205       | 300                   |
| APC-Cy7                                | SiglecF       | E50-2440     | BD Pharmingen   | 565527       | 300                   |
| AF700                                  | Ly-6G         | 1A8          | BioLegend       | 127622       | 400                   |
| APC                                    | CD64          | X54-5/7.1    | BioLegend       | 139306       | 100                   |
| Biotin                                 | SIRPa         | P84          | BioLegend       | 144026       | 100                   |
| BUV661                                 | CD3           | 145-2C11     | BD OptiBuild    | 750638       | 400                   |
| BV785                                  | CD90.2        | 30-H12       | BioLegend       | 105331       | 1000                  |
| BV711                                  | CD4           | RM4-5        | BioLegend       | 100550       | 100                   |
| BV650                                  | CD19          | 6D5          | BioLegend       | 115541       | 300                   |
| BV605                                  | CD25          | PC61         | BioLegend       | 102036       | 200                   |
| BV421                                  | CD11b         | M1/70        | BioLegend       | 101251       | 300                   |
| BV421                                  | CD11c         | N418         | BioLegend       | 117343       | 300                   |
| BV421                                  | F4/80         | BM8          | BioLegend       | 123137       | 300                   |
| BV421                                  | GR-1          | RB6-8C5      | BioLegend       | 108445       | 300                   |
| BV421                                  | TER-119       | TER-119      | BioLegend       | 116234       | 300                   |
| PerCP-eF710                            | KLRG1         | 2F1          | Invitrogen      | 46-5893-82   | 300                   |
| FITC                                   | Ki67          | 11F6         | BioLegend       | 151212       | 300                   |
| PE-Cy7                                 | NKp46         | 29A1.4       | BioLegend       | 137618       | 200                   |
| PE                                     | ST2           | DIH4         | BioLegend       | 146607       | 300                   |
| APC-F750                               | TCR gd        | GL3          | BioLegend       | 118136       | 150                   |
| AF700                                  | TCR b         | H57-597      | BioLegend       | 109224       | 400                   |
| APC                                    | DX5           | DX5          | BioLegend       | 108910       | 100                   |
|                                        |               |              |                 |              |                       |
| <b>Viability dye</b>                   |               |              |                 |              |                       |
| Zombie Red                             | dead cells    |              | BioLegend       | 423110       | 1500                  |

## Report of sequencing QC stats

|                   | <b>Name</b> | <b>Number of Spots Under Tissue</b> |
|-------------------|-------------|-------------------------------------|
| o25586_1_1-wt-ctl | wt-ctl      | 3146                                |
| o25586_1_2-ko-ctl | ko-ctl      | 3411                                |
| o25586_1_3-wt-5w  | wt-5w       | 3515                                |
| o25586_1_4-ko-5w  | ko-5w       | 3872                                |
| o25586_1_6-ko3-8w | ko-8w       | 3347                                |
| o25586_1_7-wt5-8w | wt-8w       | 3320                                |

|                   | <b>Name</b> | <b>Number of Reads</b> | <b>Mean Reads per Spot</b> |
|-------------------|-------------|------------------------|----------------------------|
| o25586_1_1-wt-ctl | wt-ctl      | 256055078              | 81390.67959                |
| o25586_1_2-ko-ctl | ko-ctl      | 193407956              | 56701.24773                |
| o25586_1_3-wt-5w  | wt-5w       | 214021389              | 60888.01963                |
| o25586_1_4-ko-5w  | ko-5w       | 291406727              | 75260.00181                |
| o25586_1_6-ko3-8w | ko-8w       | 224717809              | 67140.06842                |
| o25586_1_7-wt5-8w | wt-8w       | 231795128              | 69817.80964                |

|                   | <b>Name</b> | <b>Mean Reads Under Tissue per Spot Fraction of Spots Under Tissue</b> |             |
|-------------------|-------------|------------------------------------------------------------------------|-------------|
| o25586_1_1-wt-ctl | wt-ctl      | 51496.6691                                                             | 0.630208333 |
| o25586_1_2-ko-ctl | ko-ctl      | 36446.04134                                                            | 0.683293269 |
| o25586_1_3-wt-5w  | wt-5w       | 50968.03812                                                            | 0.704126603 |
| o25586_1_4-ko-5w  | ko-5w       | 60087.7079                                                             | 0.775641026 |
| o25586_1_6-ko3-8w | ko-8w       | 46411.46011                                                            | 0.670472756 |
| o25586_1_7-wt5-8w | wt-8w       | 51555.46024                                                            | 0.665064103 |

|                   | <b>Name</b> | <b>Median Genes per Spot</b> | <b>Median UMI Counts per Spot</b> |
|-------------------|-------------|------------------------------|-----------------------------------|
| o25586_1_1-wt-ctl | wt-ctl      | 4234.5                       | 16670                             |
| o25586_1_2-ko-ctl | ko-ctl      | 3244                         | 10801                             |
| o25586_1_3-wt-5w  | wt-5w       | 4321                         | 14337                             |
| o25586_1_4-ko-5w  | ko-5w       | 5178                         | 19197                             |
| o25586_1_6-ko3-8w | ko-8w       | 3655                         | 9007                              |
| o25586_1_7-wt5-8w | wt-8w       | 3299.5                       | 8285                              |

|                   | <b>Name</b> | <b>Median Genes per Spot</b> | <b>Median UMI Counts per Spot</b> |
|-------------------|-------------|------------------------------|-----------------------------------|
| o25586_1_1-wt-ctl | wt-ctl      | 4234.5                       | 16670                             |
| o25586_1_2-ko-ctl | ko-ctl      | 3244                         | 10801                             |
| o25586_1_3-wt-5w  | wt-5w       | 4321                         | 14337                             |
| o25586_1_4-ko-5w  | ko-5w       | 5178                         | 19197                             |
| o25586_1_6-ko3-8w | ko-8w       | 3655                         | 9007                              |
| o25586_1_7-wt5-8w | wt-8w       | 3299.5                       | 8285                              |

|                   | <b>Name</b> | <b>Median Genes per Spot</b> | <b>Median UMI Counts per Spot</b> |
|-------------------|-------------|------------------------------|-----------------------------------|
| o25586_1_1-wt-ctl | wt-ctl      | 4234.5                       | 16670                             |
| o25586_1_2-ko-ctl | ko-ctl      | 3244                         | 10801                             |
| o25586_1_3-wt-5w  | wt-5w       | 4321                         | 14337                             |
| o25586_1_4-ko-5w  | ko-5w       | 5178                         | 19197                             |

|                   |       |        |      |
|-------------------|-------|--------|------|
| o25586_1_6-ko3-8w | ko-8w | 3655   | 9007 |
| o25586_1_7-wt5-8w | wt-8w | 3299.5 | 8285 |

|  | Name              | Valid Barcodes | Valid UMIs  |             |
|--|-------------------|----------------|-------------|-------------|
|  | o25586_1_1-wt-ctl | wt-ctl         | 0.96230914  | 0.99842514  |
|  | o25586_1_2-ko-ctl | ko-ctl         | 0.963811225 | 0.998520304 |
|  | o25586_1_3-wt-5w  | wt-5w          | 0.963844684 | 0.998216459 |
|  | o25586_1_4-ko-5w  | ko-5w          | 0.963812864 | 0.999101421 |
|  | o25586_1_6-ko3-8w | ko-8w          | 0.960277741 | 0.999395193 |
|  | o25586_1_7-wt5-8w | wt-8w          | 0.957380895 | 0.999561354 |

|  | Name              | Sequencing Saturation | Q30 Bases in Barcode |             |
|--|-------------------|-----------------------|----------------------|-------------|
|  | o25586_1_1-wt-ctl | wt-ctl                | 0.580787016          | 0.945740689 |
|  | o25586_1_2-ko-ctl | ko-ctl                | 0.587929653          | 0.947285749 |
|  | o25586_1_3-wt-5w  | wt-5w                 | 0.634684432          | 0.948436636 |
|  | o25586_1_4-ko-5w  | ko-5w                 | 0.618744854          | 0.949343766 |
|  | o25586_1_6-ko3-8w | ko-8w                 | 0.740219229          | 0.949567813 |
|  | o25586_1_7-wt5-8w | wt-8w                 | 0.801069095          | 0.950086734 |

|  | Name              | Sequencing Saturation | Q30 Bases in Barcode |             |
|--|-------------------|-----------------------|----------------------|-------------|
|  | o25586_1_1-wt-ctl | wt-ctl                | 0.580787016          | 0.945740689 |
|  | o25586_1_2-ko-ctl | ko-ctl                | 0.587929653          | 0.947285749 |
|  | o25586_1_3-wt-5w  | wt-5w                 | 0.634684432          | 0.948436636 |
|  | o25586_1_4-ko-5w  | ko-5w                 | 0.618744854          | 0.949343766 |
|  | o25586_1_6-ko3-8w | ko-8w                 | 0.740219229          | 0.949567813 |
|  | o25586_1_7-wt5-8w | wt-8w                 | 0.801069095          | 0.950086734 |

|  | Name              | Q30 Bases in RNA Read | Q30 Bases in UMI |             |
|--|-------------------|-----------------------|------------------|-------------|
|  | o25586_1_1-wt-ctl | wt-ctl                | 0.924531035      | 0.942876603 |
|  | o25586_1_2-ko-ctl | ko-ctl                | 0.924562883      | 0.94432795  |
|  | o25586_1_3-wt-5w  | wt-5w                 | 0.923123048      | 0.945344344 |
|  | o25586_1_4-ko-5w  | ko-5w                 | 0.928655982      | 0.946804633 |
|  | o25586_1_6-ko3-8w | ko-8w                 | 0.932454876      | 0.947422186 |
|  | o25586_1_7-wt5-8w | wt-8w                 | 0.932366753      | 0.947881975 |

**RM= Reads Mapped**

|  | Name              | RM to Genome | RM Confidently to Genome |             |
|--|-------------------|--------------|--------------------------|-------------|
|  | o25586_1_1-wt-ctl | wt-ctl       | 0.869175955              | 0.842248495 |
|  | o25586_1_2-ko-ctl | ko-ctl       | 0.865237064              | 0.83669041  |
|  | o25586_1_3-wt-5w  | wt-5w        | 0.85405112               | 0.824711127 |
|  | o25586_1_4-ko-5w  | ko-5w        | 0.875439451              | 0.844984557 |
|  | o25586_1_6-ko3-8w | ko-8w        | 0.905486614              | 0.877937445 |
|  | o25586_1_7-wt5-8w | wt-8w        | 0.947664133              | 0.922604111 |

|  | Name              | RM Confidently to Intergenic Regic | RM Confidently to Intronic Regions |             |
|--|-------------------|------------------------------------|------------------------------------|-------------|
|  | o25586_1_1-wt-ctl | wt-ctl                             | 0.019555988                        | 0.013258667 |

|                   |        |             |             |
|-------------------|--------|-------------|-------------|
| o25586_1_2-ko-ctl | ko-ctl | 0.020876085 | 0.014521254 |
| o25586_1_3-wt-5w  | wt-5w  | 0.0195584   | 0.015620135 |
| o25586_1_4-ko-5w  | ko-5w  | 0.020353013 | 0.015381831 |
| o25586_1_6-ko3-8w | ko-8w  | 0.021253077 | 0.012090604 |
| o25586_1_7-wt5-8w | wt-8w  | 0.022182662 | 0.012365346 |

|                   | Name   | RM Confidently to Exonic Regions | RM Confidently to Transcriptome |
|-------------------|--------|----------------------------------|---------------------------------|
| o25586_1_1-wt-ctl | wt-ctl | 0.80943384                       | 0.788727588                     |
| o25586_1_2-ko-ctl | ko-ctl | 0.801293071                      | 0.780388972                     |
| o25586_1_3-wt-5w  | wt-5w  | 0.789532592                      | 0.769288643                     |
| o25586_1_4-ko-5w  | ko-5w  | 0.809249712                      | 0.78880806                      |
| o25586_1_6-ko3-8w | ko-8w  | 0.844593763                      | 0.822598239                     |
| o25586_1_7-wt5-8w | wt-8w  | 0.888056103                      | 0.863456608                     |

|                   | Name   | RM Antisense to Gene | Fraction Reads in Spots Under Tissue |
|-------------------|--------|----------------------|--------------------------------------|
| o25586_1_1-wt-ctl | wt-ctl | 0.006559706          | 0.656598495                          |
| o25586_1_2-ko-ctl | ko-ctl | 0.007157177          | 0.654459588                          |
| o25586_1_3-wt-5w  | wt-5w  | 0.007004842          | 0.870071277                          |
| o25586_1_4-ko-5w  | ko-5w  | 0.006450812          | 0.825810692                          |
| o25586_1_6-ko3-8w | ko-8w  | 0.006733752          | 0.722138807                          |
| o25586_1_7-wt5-8w | wt-8w  | 0.009899992          | 0.773334206                          |

|                   | Name   | Total Genes Detected |
|-------------------|--------|----------------------|
| o25586_1_1-wt-ctl | wt-ctl | 18293                |
| o25586_1_2-ko-ctl | ko-ctl | 17715                |
| o25586_1_3-wt-5w  | wt-5w  | 18690                |
| o25586_1_4-ko-5w  | ko-5w  | 19061                |
| o25586_1_6-ko3-8w | ko-8w  | 17909                |
| o25586_1_7-wt5-8w | wt-8w  | 17598                |

### After QC analysis and additional filtering

|                         |        |      |
|-------------------------|--------|------|
| o25586_1_1-wt-ctl-space | wt-ctl | 2187 |
| o25586_1_2-ko-ctl-space | ko-ctl | 2423 |
| o25586_1_3-wt-5w-space  | wt-5w  | 2770 |
| o25586_1_4-ko-5w-space  | ko-5w  | 2934 |
| o25586_1_6-ko3-8w-space | ko-8w  | 2261 |
| o25586_1_7-wt5-8w-space | wt-8w  | 2549 |

Total number of spots: 15124

Median UMIs: 14774

Median genes: 4374

Median mitochondrial percentage: 13.050

## MetaCore Analysis Report of Complex I in S3T2 PT

| MetaCore Data |           |                                                                                                     |             |                                                                  | S3T2 Ko vs WT<br>ctl_avg_log2FC |         |
|---------------|-----------|-----------------------------------------------------------------------------------------------------|-------------|------------------------------------------------------------------|---------------------------------|---------|
| #             | Input IDs | Network Object Name                                                                                 | Gene Symbol | Description                                                      | Signal                          | p-value |
| 1             |           | <a href="#">2-Decaprenyl-6-methoxy-1,4-benzoquinone intracellular anatomical structure</a>          |             | <a href="#">2-Decaprenyl-6-methoxy-1,4-benzoquinone</a>          |                                 |         |
| 2             |           | <a href="#">2-Decaprenyl-6-methoxyphenol intracellular anatomical structure</a>                     |             | <a href="#">2-Decaprenyl-6-methoxyphenol</a>                     |                                 |         |
| 3             |           | <a href="#">2-decaprenyl-3-methyl-6-methoxy-1,4-benzoquinone intracellular anatomical structure</a> |             | <a href="#">2-decaprenyl-3-methyl-6-methoxy-1,4-benzoquinone</a> |                                 |         |
| 4             |           | <a href="#">2.1.1.-</a>                                                                             |             |                                                                  |                                 |         |
| 5             |           | <a href="#">3-Decaprenyl-4,5-dihydroxybenzoate intracellular anatomical structure</a>               |             | <a href="#">3-Decaprenyl-4,5-dihydroxybenzoate</a>               |                                 |         |
| 6             |           | <a href="#">3-Decaprenyl-4-hydroxy-5-methoxybenzoate intracellular anatomical structure</a>         |             | <a href="#">3-Decaprenyl-4-hydroxy-5-methoxybenzoate</a>         |                                 |         |

|    |                |                                                                                                                                    |                         |                                                                            |           |   |
|----|----------------|------------------------------------------------------------------------------------------------------------------------------------|-------------------------|----------------------------------------------------------------------------|-----------|---|
| 7  |                | <a href="#">3-Hexaprenyl-4-hydroxy-benzoic acid intracellular anatomical structure</a>                                             |                         | <a href="#">3-Hexaprenyl-4-hydroxy-benzoic acid</a>                        |           |   |
| 8  |                | <a href="#">4-Hydroxy-benzoic acid intracellular anatomical structure</a>                                                          |                         | <a href="#">4-Hydroxy-benzoic acid</a>                                     |           |   |
| 9  |                | <a href="#">COQ3</a>                                                                                                               | <a href="#">Coq3</a>    | <a href="#">Ubiquinone biosynthesis O-methyltransferase, mitochondrial</a> |           |   |
| 10 |                | <a href="#">COQ6</a>                                                                                                               | <a href="#">Coq6</a>    | <a href="#">Ubiquinone biosynthesis monooxygenase COQ6, mitochondrial</a>  |           |   |
| 11 |                | <a href="#">Coenzyme-Q10 intracellular anatomical structure</a>                                                                    |                         | <a href="#">Coenzyme-Q10</a>                                               |           |   |
| 12 | <b>Ndufa12</b> | <a href="#">DAP13</a>                                                                                                              | <a href="#">Ndufa12</a> | <a href="#">NADH dehydrogenase [ubiquinone] 1 alpha subcomplex</a>         | -0.490431 | 0 |
| 13 |                | <a href="#">H(+)+ Coenzyme-Q10 + NADH = Ubiquinol-10 + NAD(+)</a>                                                                  |                         |                                                                            |           |   |
| 14 |                | <a href="#">H(+)+ NAD(P)H + O(,2) + 2-decaprenyl-3-methyl-6-methoxy-1,4-benzoquinone = NADP(+)+ demethyl-Coenzyme-Q10 + H(,2)O</a> |                         |                                                                            |           |   |

|    |                |                                                                                                                                                                           |                      |                                                         |           |   |
|----|----------------|---------------------------------------------------------------------------------------------------------------------------------------------------------------------------|----------------------|---------------------------------------------------------|-----------|---|
| 15 |                | <a href="#">H(+)</a> + <a href="#">NAD(P)H</a><br>+ <a href="#">p-Hydroxyphenylpyruvic acid</a> =<br><a href="#">NADP(+)</a> + <a href="#">p-Hydroxyphenyllactic acid</a> |                      |                                                         |           |   |
| 16 |                | <a href="#">L-Aspartic acid</a> +<br><a href="#">p-Hydroxyphenylpyruvic acid</a> = <a href="#">L-Tyrosine</a> +<br><a href="#">Oxaloacetic acid</a>                       |                      |                                                         |           |   |
| 17 |                | <a href="#">L-Tyrosine intracellular anatomical structure</a>                                                                                                             |                      | <a href="#">L-Tyrosine</a>                              |           |   |
| 18 | <b>mt-Nd5</b>  | <a href="#">MT-ND5</a>                                                                                                                                                    | <a href="#">ND5</a>  | <a href="#">NADH-ubiquinone oxidoreductase chain 5</a>  | -0.500391 | 0 |
| 19 | <b>mt-Nd1</b>  | <a href="#">MTND1</a>                                                                                                                                                     | <a href="#">ND1</a>  | <a href="#">NADH-ubiquinone oxidoreductase chain 1</a>  | -0.312574 | 0 |
| 20 | <b>mt-Nd2</b>  | <a href="#">MTND2</a>                                                                                                                                                     | <a href="#">ND2</a>  | <a href="#">NADH-ubiquinone oxidoreductase chain 2</a>  | -0.345866 | 0 |
| 21 | <b>mt-Nd3</b>  | <a href="#">MTND3</a>                                                                                                                                                     | <a href="#">ND3</a>  | <a href="#">NADH-ubiquinone oxidoreductase chain 3</a>  | -0.253271 | 0 |
| 22 | <b>mt-Nd4</b>  | <a href="#">MTND4</a>                                                                                                                                                     | <a href="#">ND4</a>  | <a href="#">NADH-ubiquinone oxidoreductase chain 4</a>  | -0.37974  | 0 |
| 23 | <b>mt-Nd4I</b> | <a href="#">MTND4L</a>                                                                                                                                                    | <a href="#">ND4L</a> | <a href="#">NADH-ubiquinone oxidoreductase chain 4L</a> | -0.431259 | 0 |

|    |                |                         |                         |                                                                                |           |   |
|----|----------------|-------------------------|-------------------------|--------------------------------------------------------------------------------|-----------|---|
| 24 |                | <a href="#">MTND6</a>   | <a href="#">ND6</a>     | <a href="#">NADH-ubiquinone oxidoreductase chain 6</a>                         |           |   |
| 25 | <b>Ndufa1</b>  | <a href="#">NDUFA1</a>  | <a href="#">Ndufa1</a>  | <a href="#">NADH dehydrogenase [ubiquinone] 1 alpha subcomplex subunit 1</a>   | -0.638382 | 0 |
| 26 | <b>Ndufa10</b> | <a href="#">NDUFA10</a> | <a href="#">Ndufa10</a> | <a href="#">NADH dehydrogenase [ubiquinone] 1 alpha subcomplex subunit 10,</a> | -0.526248 | 0 |
| 27 | <b>Ndufa11</b> | <a href="#">NDUFA11</a> | <a href="#">Ndufa11</a> | <a href="#">NADH dehydrogenase [ubiquinone] 1 alpha subcomplex subunit 11</a>  | -0.400389 | 0 |
| 28 | <b>Ndufa13</b> | <a href="#">NDUFA13</a> | <a href="#">Ndufa13</a> | <a href="#">NADH dehydrogenase [ubiquinone] 1 alpha subcomplex subunit 13</a>  | -0.500268 | 0 |
| 29 | <b>Ndufa2</b>  | <a href="#">NDUFA2</a>  | <a href="#">Ndufa2</a>  | <a href="#">NADH dehydrogenase [ubiquinone] 1 alpha subcomplex subunit 2</a>   | -0.645568 | 0 |
| 30 | <b>Ndufa3</b>  | <a href="#">NDUFA3</a>  | <a href="#">Ndufa3</a>  | <a href="#">NADH dehydrogenase [ubiquinone] 1 alpha subcomplex subunit 3</a>   | -0.633872 | 0 |
| 31 | <b>Ndufa4</b>  | <a href="#">NDUFA4</a>  | <a href="#">Ndufa4</a>  | <a href="#">Cytochrome c oxidase subunit NDUFA4</a>                            | -0.647713 | 0 |



|    |                |                         |                         |                                                                                             |           |   |
|----|----------------|-------------------------|-------------------------|---------------------------------------------------------------------------------------------|-----------|---|
| 32 | <b>Ndufa5</b>  | <a href="#">NDUFA5</a>  | <a href="#">Ndufa5</a>  | <a href="#">NADH dehydrogenase [ubiquinone] 1 alpha subcomplex subunit 5</a>                | -0.469147 | 0 |
| 33 | <b>Ndufa6</b>  | <a href="#">NDUFA6</a>  | <a href="#">Ndufa6</a>  | <a href="#">NADH dehydrogenase [ubiquinone] 1 alpha subcomplex subunit 6</a>                | -0.687919 | 0 |
| 34 | <b>Ndufa7</b>  | <a href="#">NDUFA7</a>  | <a href="#">Ndufa7</a>  | <a href="#">NADH dehydrogenase [ubiquinone] 1 alpha subcomplex subunit 7</a>                | -0.55122  | 0 |
| 35 | <b>Ndufa8</b>  | <a href="#">NDUFA8</a>  | <a href="#">Ndufa8</a>  | <a href="#">NADH dehydrogenase [ubiquinone] 1 alpha subcomplex subunit 8</a>                | -0.409007 | 0 |
| 36 | <b>Ndufa9</b>  | <a href="#">NDUFA9</a>  | <a href="#">Ndufa9</a>  | <a href="#">NADH dehydrogenase [ubiquinone] 1 alpha subcomplex subunit 9, mitochondrial</a> | -0.503337 | 0 |
| 37 | <b>Ndufab1</b> | <a href="#">NDUFAB1</a> | <a href="#">Ndufab1</a> | <a href="#">Acyl carrier protein, mitochondrial</a>                                         | -0.534754 | 0 |
| 38 | <b>Ndufb10</b> | <a href="#">NDUFB10</a> | <a href="#">Ndufb10</a> | <a href="#">NADH dehydrogenase [ubiquinone] 1 beta subcomplex subunit 10</a>                | -0.461899 | 0 |

|    |               |                        |                         |                                                                                            |           |   |
|----|---------------|------------------------|-------------------------|--------------------------------------------------------------------------------------------|-----------|---|
| 39 | <b>Ndufb2</b> | <a href="#">NDUFB2</a> | <a href="#">Ndufb2</a>  | <a href="#">NADH dehydrogenase [ubiquinone] 1 beta subcomplex subunit 2, mitochondrial</a> | -0.498395 | 0 |
| 40 | <b>Ndufb3</b> | <a href="#">NDUFB3</a> | <a href="#">Ndufb3</a>  | <a href="#">NADH dehydrogenase [ubiquinone] 1 beta subcomplex subunit 3</a>                | -0.4932   | 0 |
| 41 | <b>Ndufb4</b> | <a href="#">NDUFB4</a> | <a href="#">Ndufb4</a>  | <a href="#">NADH dehydrogenase [ubiquinone] 1 beta subcomplex subunit 4</a>                | -0.581655 | 0 |
| 42 | <b>Ndufb4</b> | <a href="#">NDUFB4</a> | <a href="#">Ndufb4b</a> | <a href="#">NADH dehydrogenase [ubiquinone] 1 beta subcomplex subunit 4</a>                | -0.581655 | 0 |
| 43 | <b>Ndufb5</b> | <a href="#">NDUFB5</a> | <a href="#">Ndufb5</a>  | <a href="#">NADH dehydrogenase [ubiquinone] 1 beta subcomplex subunit 5, mitochondrial</a> | -0.53372  | 0 |
| 44 | <b>Ndufb6</b> | <a href="#">NDUFB6</a> | <a href="#">Ndufb6</a>  | <a href="#">NADH dehydrogenase [ubiquinone] 1 beta subcomplex subunit 6</a>                | -0.519488 | 0 |
| 45 | <b>Ndufb7</b> | <a href="#">NDUFB7</a> | <a href="#">Ndufb7</a>  | <a href="#">NADH dehydrogenase [ubiquinone] 1 beta subcomplex subunit 7</a>                | -0.374883 | 0 |

|    |               |                        |                        |                                                                                            |           |   |
|----|---------------|------------------------|------------------------|--------------------------------------------------------------------------------------------|-----------|---|
| 46 | <b>Ndufb8</b> | <a href="#">NDUFB8</a> | <a href="#">Ndufb8</a> | <a href="#">NADH dehydrogenase [ubiquinone] 1 beta subcomplex subunit 8, mitochondrial</a> | -0.523241 | 0 |
| 47 | <b>Ndufb9</b> | <a href="#">NDUFB9</a> | <a href="#">Ndufb9</a> | <a href="#">NADH dehydrogenase [ubiquinone] 1 beta subcomplex subunit 9</a>                | -0.530734 | 0 |
| 48 | <b>Ndufc1</b> | <a href="#">NDUFC1</a> | <a href="#">Ndufc1</a> | <a href="#">NADH dehydrogenase [ubiquinone] 1 subunit C1, mitochondrial</a>                | -0.655074 | 0 |
| 49 | <b>Ndufc2</b> | <a href="#">NDUFC2</a> | <a href="#">Ndufc2</a> | <a href="#">NADH dehydrogenase [ubiquinone] 1 subunit C2</a>                               | -0.485233 | 0 |
| 50 | <b>Ndufs1</b> | <a href="#">NDUFS1</a> | <a href="#">Ndufs1</a> | <a href="#">NADH-ubiquinone oxidoreductase 75 kDa subunit, mitochondrial</a>               | -0.641851 | 0 |
| 51 | <b>Ndufs2</b> | <a href="#">NDUFS2</a> | <a href="#">Ndufs2</a> | <a href="#">NADH dehydrogenase [ubiquinone] iron-sulfur protein 2, mitochondrial</a>       | -0.57924  | 0 |
| 52 | <b>Ndufs3</b> | <a href="#">NDUFS3</a> | <a href="#">Ndufs3</a> | <a href="#">NADH dehydrogenase [ubiquinone] iron-sulfur protein 3, mitochondrial</a>       | -0.438247 | 0 |

|    |               |                        |                        |                                                                                      |           |   |
|----|---------------|------------------------|------------------------|--------------------------------------------------------------------------------------|-----------|---|
| 53 | <b>Ndufs4</b> | <a href="#">NDUFS4</a> | <a href="#">Ndufs4</a> | <a href="#">NADH dehydrogenase [ubiquinone] iron-sulfur protein 4, mitochondrial</a> | -0.477776 | 0 |
| 54 | <b>Ndufs5</b> | <a href="#">NDUFS5</a> | <a href="#">Ndufs5</a> | <a href="#">NADH dehydrogenase [ubiquinone] iron-sulfur protein 5</a>                | -0.413575 | 0 |
| 55 | <b>Ndufs6</b> | <a href="#">NDUFS6</a> | <a href="#">Ndufs6</a> | <a href="#">NADH dehydrogenase [ubiquinone] iron-sulfur protein 6, mitochondrial</a> | -0.567075 | 0 |
| 56 | <b>Ndufs7</b> | <a href="#">NDUFS7</a> | <a href="#">Ndufs7</a> | <a href="#">NADH dehydrogenase [ubiquinone] iron-sulfur protein 7, mitochondrial</a> | -0.442479 | 0 |
| 57 | <b>Ndufs8</b> | <a href="#">NDUFS8</a> | <a href="#">Ndufs8</a> | <a href="#">NADH dehydrogenase [ubiquinone] iron-sulfur protein 8, mitochondrial</a> | -0.432103 | 0 |
| 58 | <b>Ndufv1</b> | <a href="#">NDUFV1</a> | <a href="#">Ndufv1</a> | <a href="#">NADH dehydrogenase [ubiquinone] flavoprotein 1, mitochondrial</a>        | -0.613443 | 0 |
| 59 | <b>Ndufv2</b> | <a href="#">NDUFV2</a> | <a href="#">Ndufv2</a> | <a href="#">NADH dehydrogenase [ubiquinone] flavoprotein 2, mitochondrial</a>        | -0.561687 | 0 |
| 60 | <b>Ndufv3</b> | <a href="#">NDUFV3</a> | <a href="#">Ndufv3</a> | <a href="#">NADH dehydrogenase [ubiquinone] flavoprotein 3, mitochondrial</a>        | -0.53266  | 0 |

|    |                |                                                                                                         |                      |  |           |   |
|----|----------------|---------------------------------------------------------------------------------------------------------|----------------------|--|-----------|---|
| 61 |                | <a href="#">O(,2) + 2-Decaprenyl-6-methoxyphenol = H(,2)O + 2-Decaprenyl-6-methoxy-1,4-benzoquinone</a> |                      |  |           |   |
| 62 | <b>mt-Nd1</b>  | <a href="#">Respiratory Complex I (NADH-ubiquinone oxidoreductase)</a>                                  | <a href="#">ND1</a>  |  | -0.312574 | 0 |
| 63 | <b>mt-Nd2</b>  | <a href="#">Respiratory Complex I (NADH-ubiquinone oxidoreductase)</a>                                  | <a href="#">ND2</a>  |  | -0.345866 | 0 |
| 64 | <b>mt-Nd3</b>  | <a href="#">Respiratory Complex I (NADH-ubiquinone oxidoreductase)</a>                                  | <a href="#">ND3</a>  |  | -0.253271 | 0 |
| 65 | <b>mt-Nd4</b>  | <a href="#">Respiratory Complex I (NADH-ubiquinone oxidoreductase)</a>                                  | <a href="#">ND4</a>  |  | -0.37974  | 0 |
| 66 | <b>mt-Nd4I</b> | <a href="#">Respiratory Complex I (NADH-ubiquinone oxidoreductase)</a>                                  | <a href="#">ND4L</a> |  | -0.431259 | 0 |
| 67 | <b>mt-Nd5</b>  | <a href="#">Respiratory Complex I (NADH-ubiquinone oxidoreductase)</a>                                  | <a href="#">ND5</a>  |  | -0.500391 | 0 |

|    |                |                                                                        |                          |  |           |   |
|----|----------------|------------------------------------------------------------------------|--------------------------|--|-----------|---|
| 68 |                | <a href="#">Respiratory Complex I (NADH-ubiquinone oxidoreductase)</a> | <a href="#">ND6</a>      |  |           |   |
| 69 | <b>Ndufa1</b>  | <a href="#">Respiratory Complex I (NADH-ubiquinone oxidoreductase)</a> | <a href="#">Ndufa1</a>   |  | -0.638382 | 0 |
| 70 | <b>Ndufa10</b> | <a href="#">Respiratory Complex I (NADH-ubiquinone oxidoreductase)</a> | <a href="#">Ndufa10</a>  |  | -0.526248 | 0 |
| 71 | <b>Ndufa11</b> | <a href="#">Respiratory Complex I (NADH-ubiquinone oxidoreductase)</a> | <a href="#">Ndufa11b</a> |  | -0.400389 | 0 |
| 72 | <b>Ndufa12</b> | <a href="#">Respiratory Complex I (NADH-ubiquinone oxidoreductase)</a> | <a href="#">Ndufa12</a>  |  | -0.490431 | 0 |
| 73 | <b>Ndufa13</b> | <a href="#">Respiratory Complex I (NADH-ubiquinone oxidoreductase)</a> | <a href="#">Ndufa13</a>  |  | -0.500268 | 0 |
| 74 | <b>Ndufa2</b>  | <a href="#">Respiratory Complex I (NADH-ubiquinone oxidoreductase)</a> | <a href="#">Ndufa2</a>   |  | -0.645568 | 0 |
| 75 | <b>Ndufa3</b>  | <a href="#">Respiratory Complex I (NADH-ubiquinone oxidoreductase)</a> | <a href="#">Ndufa3</a>   |  | -0.633872 | 0 |

|    |                |                                                                        |                         |  |           |   |
|----|----------------|------------------------------------------------------------------------|-------------------------|--|-----------|---|
| 76 | <b>Ndufa4</b>  | <a href="#">Respiratory Complex I (NADH-ubiquinone oxidoreductase)</a> | <a href="#">Ndufa4</a>  |  | -0.647713 | 0 |
| 77 | <b>Ndufa5</b>  | <a href="#">Respiratory Complex I (NADH-ubiquinone oxidoreductase)</a> | <a href="#">Ndufa5</a>  |  | -0.469147 | 0 |
| 78 | <b>Ndufa6</b>  | <a href="#">Respiratory Complex I (NADH-ubiquinone oxidoreductase)</a> | <a href="#">Ndufa6</a>  |  | -0.687919 | 0 |
| 79 | <b>Ndufa7</b>  | <a href="#">Respiratory Complex I (NADH-ubiquinone oxidoreductase)</a> | <a href="#">Ndufa7</a>  |  | -0.55122  | 0 |
| 80 | <b>Ndufa8</b>  | <a href="#">Respiratory Complex I (NADH-ubiquinone oxidoreductase)</a> | <a href="#">Ndufa8</a>  |  | -0.409007 | 0 |
| 81 | <b>Ndufa9</b>  | <a href="#">Respiratory Complex I (NADH-ubiquinone oxidoreductase)</a> | <a href="#">Ndufa9</a>  |  | -0.503337 | 0 |
| 82 | <b>Ndufab1</b> | <a href="#">Respiratory Complex I (NADH-ubiquinone oxidoreductase)</a> | <a href="#">Ndufab1</a> |  | -0.534754 | 0 |
| 83 | <b>Ndufb10</b> | <a href="#">Respiratory Complex I (NADH-ubiquinone oxidoreductase)</a> | <a href="#">Ndufb10</a> |  | -0.461899 | 0 |

|    |                |                                                                        |                         |  |           |   |
|----|----------------|------------------------------------------------------------------------|-------------------------|--|-----------|---|
| 84 | <b>Ndufb11</b> | <a href="#">Respiratory Complex I (NADH-ubiquinone oxidoreductase)</a> | <a href="#">Ndufb11</a> |  | -0.53213  | 0 |
| 85 | <b>Ndufb2</b>  | <a href="#">Respiratory Complex I (NADH-ubiquinone oxidoreductase)</a> | <a href="#">Ndufb2</a>  |  | -0.498395 | 0 |
| 86 | <b>Ndufb3</b>  | <a href="#">Respiratory Complex I (NADH-ubiquinone oxidoreductase)</a> | <a href="#">Ndufb3</a>  |  | -0.4932   | 0 |
| 87 | <b>Ndufb4</b>  | <a href="#">Respiratory Complex I (NADH-ubiquinone oxidoreductase)</a> | <a href="#">Ndufb4</a>  |  | -0.581655 | 0 |
| 88 | <b>Ndufb4</b>  | <a href="#">Respiratory Complex I (NADH-ubiquinone oxidoreductase)</a> | <a href="#">Ndufb4b</a> |  | -0.581655 | 0 |
| 89 | <b>Ndufb5</b>  | <a href="#">Respiratory Complex I (NADH-ubiquinone oxidoreductase)</a> | <a href="#">Ndufb5</a>  |  | -0.53372  | 0 |
| 90 | <b>Ndufb6</b>  | <a href="#">Respiratory Complex I (NADH-ubiquinone oxidoreductase)</a> | <a href="#">Ndufb6</a>  |  | -0.519488 | 0 |
| 91 | <b>Ndufb7</b>  | <a href="#">Respiratory Complex I (NADH-ubiquinone oxidoreductase)</a> | <a href="#">Ndufb7</a>  |  | -0.374883 | 0 |



|    |               |                                                                        |                        |  |           |   |
|----|---------------|------------------------------------------------------------------------|------------------------|--|-----------|---|
| 92 | <b>Ndufb8</b> | <a href="#">Respiratory Complex I (NADH-ubiquinone oxidoreductase)</a> | <a href="#">Ndufb8</a> |  | -0.523241 | 0 |
| 93 | <b>Ndufb9</b> | <a href="#">Respiratory Complex I (NADH-ubiquinone oxidoreductase)</a> | <a href="#">Ndufb9</a> |  | -0.530734 | 0 |
| 94 | <b>Ndufc1</b> | <a href="#">Respiratory Complex I (NADH-ubiquinone oxidoreductase)</a> | <a href="#">Ndufc1</a> |  | -0.655074 | 0 |
| 95 | <b>Ndufc2</b> | <a href="#">Respiratory Complex I (NADH-ubiquinone oxidoreductase)</a> | <a href="#">Ndufc2</a> |  | -0.485233 | 0 |
| 96 | <b>Ndufs1</b> | <a href="#">Respiratory Complex I (NADH-ubiquinone oxidoreductase)</a> | <a href="#">Ndufs1</a> |  | -0.641851 | 0 |
| 97 | <b>Ndufs2</b> | <a href="#">Respiratory Complex I (NADH-ubiquinone oxidoreductase)</a> | <a href="#">Ndufs2</a> |  | -0.57924  | 0 |
| 98 | <b>Ndufs3</b> | <a href="#">Respiratory Complex I (NADH-ubiquinone oxidoreductase)</a> | <a href="#">Ndufs3</a> |  | -0.438247 | 0 |
| 99 | <b>Ndufs4</b> | <a href="#">Respiratory Complex I (NADH-ubiquinone oxidoreductase)</a> | <a href="#">Ndufs4</a> |  | -0.477776 | 0 |

|     |               |                                                                        |                        |  |           |   |
|-----|---------------|------------------------------------------------------------------------|------------------------|--|-----------|---|
| 100 | <b>Ndufs5</b> | <a href="#">Respiratory Complex I (NADH-ubiquinone oxidoreductase)</a> | <a href="#">Ndufs5</a> |  | -0.413575 | 0 |
| 101 | <b>Ndufs6</b> | <a href="#">Respiratory Complex I (NADH-ubiquinone oxidoreductase)</a> | <a href="#">Ndufs6</a> |  | -0.567075 | 0 |
| 102 | <b>Ndufs7</b> | <a href="#">Respiratory Complex I (NADH-ubiquinone oxidoreductase)</a> | <a href="#">Ndufs7</a> |  | -0.442479 | 0 |
| 103 | <b>Ndufs8</b> | <a href="#">Respiratory Complex I (NADH-ubiquinone oxidoreductase)</a> | <a href="#">Ndufs8</a> |  | -0.432103 | 0 |
| 104 | <b>Ndufv1</b> | <a href="#">Respiratory Complex I (NADH-ubiquinone oxidoreductase)</a> | <a href="#">Ndufv1</a> |  | -0.613443 | 0 |
| 105 | <b>Ndufv2</b> | <a href="#">Respiratory Complex I (NADH-ubiquinone oxidoreductase)</a> | <a href="#">Ndufv2</a> |  | -0.561687 | 0 |
| 106 | <b>Ndufv3</b> | <a href="#">Respiratory Complex I (NADH-ubiquinone oxidoreductase)</a> | <a href="#">Ndufv3</a> |  | -0.53266  | 0 |

|     |  |                                                                                                                                                                  |                     |                                           |  |  |
|-----|--|------------------------------------------------------------------------------------------------------------------------------------------------------------------|---------------------|-------------------------------------------|--|--|
| 107 |  | <a href="#">S-Adenosyl-L-methionine + 2-Decaprenyl-6-methoxy-1,4-benzoquinone = S-Adenosyl-L-homocysteine + 2-decaprenyl-3-methyl-6-methoxy-1,4-benzoquinone</a> |                     |                                           |  |  |
| 108 |  | <a href="#">S-Adenosyl-L-methionine + 3-Decaprenyl-4,5-dihydroxybenzoate = S-Adenosyl-L-homocysteine + 3-Decaprenyl-4-hydroxy-5-methoxybenzoate</a>              |                     |                                           |  |  |
| 109 |  | <a href="#">S-Adenosyl-L-methionine + demethyl-Coenzyme-Q10 = Coenzyme-Q10 + S-Adenosyl-L-homocysteine</a>                                                       |                     |                                           |  |  |
| 110 |  | <a href="#">TAT</a>                                                                                                                                              | <a href="#">Tat</a> | <a href="#">Tyrosine aminotransferase</a> |  |  |
| 111 |  | <a href="#">Ubiquinol-10 intracellular anatomical structure</a>                                                                                                  |                     | <a href="#">Ubiquinol-10</a>              |  |  |

|     |             |                                                                                                                                 |                      |                                                         |           |   |
|-----|-------------|---------------------------------------------------------------------------------------------------------------------------------|----------------------|---------------------------------------------------------|-----------|---|
| 112 |             | <a href="#">all-trans-Hexaprenyl diphosphate + 4-Hydroxy-benzoic acid = Pyrophosphate + 3-Hexaprenyl-4-hydroxy-benzoic acid</a> |                      |                                                         |           |   |
| 113 |             | <a href="#">all-trans-Hexaprenyl diphosphate intracellular anatomical structure</a>                                             |                      | <a href="#">all-trans-Hexaprenyl diphosphate</a>        |           |   |
| 114 | <b>Coq2</b> | <a href="#">coenzyme Q2 homolog, prenyltransferase (yeast)</a>                                                                  | <a href="#">Coq2</a> | <a href="#">4-hydroxybenzoate polyprenyltransferase</a> | -0.364377 | 0 |
| 115 |             | <a href="#">demethyl-Coenzyme-Q10 intracellular anatomical structure</a>                                                        |                      | <a href="#">demethyl-Coenzyme-Q10</a>                   |           |   |
| 116 |             | <a href="#">p-Coumaric acid extracellular region</a>                                                                            |                      | <a href="#">p-Coumaric acid</a>                         |           |   |
| 117 |             | <a href="#">p-Hydroxyphenylactic acid intracellular anatomical structure</a>                                                    |                      | <a href="#">p-Hydroxyphenylactic acid</a>               |           |   |
| 118 |             | <a href="#">p-Hydroxyphenylpyruvic acid intracellular anatomical structure</a>                                                  |                      | <a href="#">p-Hydroxyphenylpyruvic acid</a>             |           |   |
